# Supplementary material for: Progress and challenges in nitrous oxide decomposition and valorization
Source: Royal Society of Chemistry journal article supplement (doi:10.1039/d3cs00919j), 2024-01-01
Supplement: d3cs00919j1.pdf [file d3cs00919j1.pdf]

## Supplementary Information

### Progress and Challenges on Nitrous Oxide Decomposition and Valorization

Xuanhao Wu<sup>†, a</sup>, Jiaxin Du<sup>†, a</sup>, Yanxia Gao<sup>†, a</sup>, Haiqiang Wang<sup>a</sup>, Changbin Zhang<sup>b</sup>,  
Runduo Zhang<sup>\*, c</sup>, Hong He<sup>\*, b</sup>, Gaoqing (Max) Lu<sup>\*, d</sup>, and Zhongbiao Wu<sup>\*, a</sup>

*<sup>a</sup> Department of Environmental Engineering, Zhejiang University, China Zhejiang Provincial Engineering Research Center of Industrial Boiler & Furnace Flue Gas Pollution Control, Hangzhou, 310058 P. R. China.*

*<sup>b</sup> State Key Joint Laboratory of Environment Simulation and Pollution Control, Research Center for Eco- Environmental Sciences, Chinese Academy of Sciences, University of Chinese Academy of Sciences, Beijing 100049, China.*

*<sup>c</sup> State Key Laboratory of Chemical Resource Engineering, Beijing University of Chemical Technology, Beijing 100029, China.*

*<sup>d</sup> University of Surrey, GU2 7XH, Guildford, UK.*

\*Corresponding authors: E-mail: zhangrd@mail.buct.edu.cn, honghe@rcees.ac.cn, m.lu@surrey.ac.uk, zbwu@zju.edu.cn

**Table S1.** Summary of representative studies on technologies for N<sub>2</sub>O elimination.

| Reaction type      | Catalyst                                                       | Reaction conduction                                                                                                                                                     | Reaction activity                                                                                    | Ref.                                                                                                                                                                                                                                     |
|--------------------|----------------------------------------------------------------|-------------------------------------------------------------------------------------------------------------------------------------------------------------------------|------------------------------------------------------------------------------------------------------|------------------------------------------------------------------------------------------------------------------------------------------------------------------------------------------------------------------------------------------|
| deN <sub>2</sub> O | (5 wt.%) Ir/ZrO <sub>2</sub>                                   | 200 ppm N <sub>2</sub> O, 10% O <sub>2</sub> , N <sub>2</sub> balance at 100 cm <sup>3</sup> ·min <sup>-1</sup> and W/F = 5.0 × 10 <sup>-4</sup> g·min·cm <sup>-3</sup> | T <sub>50</sub> = 329 °C                                                                             | S. Hinokuma, T. Iwasa, Y. Kon, T. Taketsugu and K. Sato, <i>Catal. Commun.</i> , 2021, <b>149</b> , 106208..                                                                                                                             |
| deN <sub>2</sub> O | Ir/Al <sub>2</sub> O <sub>3</sub>                              | 1000 ppm N <sub>2</sub> O balanced with He, total flow rate of 150 cm <sup>3</sup> min <sup>-1</sup> , WHSV of 180,000 cm <sup>3</sup> g <sup>-1</sup> h <sup>-1</sup>  | T <sub>100</sub> ≈ 480 °C                                                                            | I. V. Yentekakis, G. Goula, P. Panagiotopoulou, S. Kampouri, M. J. Taylor, G. Kyriakou and R. M. Lambert, <i>Appl. Catal., B-Environ.</i> , 2016, <b>192</b> , 357-364.                                                                  |
| deN <sub>2</sub> O | (0.5 wt.%) Ir/CeO <sub>2</sub> -Al <sub>2</sub> O <sub>3</sub> | 1000 ppm N <sub>2</sub> O balanced with He, GHSV of 40000 h <sup>-1</sup>                                                                                               | T <sub>100</sub> = 600 °C                                                                            | E. Pachatouridou, E. Papista, A. Delimitis, M. A. Vasiliades, A. M. Efstathiou, M. D. Amiridis, O. S. Alexeev, D. Bloom, G. E. Marnellos, M. Konsolakis and E. Iliopoulou, <i>Appl. Catal., B-Environ.</i> , 2016, <b>187</b> , 259-268. |
| deN <sub>2</sub> O | (5 wt.%) Ir/TiO <sub>2</sub> -Al <sub>2</sub> O <sub>3</sub>   | 30 vol.% N <sub>2</sub> O in Ar, GHSV of 30, 000 ml h <sup>-1</sup> g <sub>cat</sub> <sup>-1</sup>                                                                      | T <sub>100</sub> = 350 °C                                                                            | S. Liu, Y. Cong, Y. Huang, X. Zhao and T. Zhang, <i>Catal. Today</i> , 2011, <b>175</b> , 264-270.                                                                                                                                       |
| deN <sub>2</sub> O | (2.6 wt.%) Pd/γAl <sub>2</sub> O <sub>3</sub>                  | 1% N <sub>2</sub> O balanced with He, total flow rate of 100 mL min <sup>-1</sup> , GHSV of 76 690 h <sup>-1</sup>                                                      | r <sub>N2O</sub> = 10.3 mol <sub>N2O</sub> h <sup>-1</sup> kg <sub>cat</sub> <sup>-1</sup> at 550 °C | N. Richards, J. H. Carter, E. Nowicka, L. A. Parker, S. Pattison, Q. He, N. F. Dummer, S. Golunski and G. J. Hutchings, <i>Appl. Catal., B-Environ.</i> , 2020, <b>264</b> , 118501.                                                     |
| deN <sub>2</sub> O | (1 wt.%) Pd/LaCoO <sub>3</sub>                                 | 1000 ppm N <sub>2</sub> O balanced with He, total flow rate of 15 L h <sup>-1</sup> , GHSV of 10 000 h <sup>-1</sup>                                                    | T <sub>50</sub> = 433 °C                                                                             | J. Dacquin, C. Dujardin and P. Granger, <i>J. Catal.</i> , 2008, <b>253</b> , 37-49.                                                                                                                                                     |
| deN <sub>2</sub> O | Rh/CeO <sub>2</sub>                                            | 200 ppm N <sub>2</sub> O, 5% CO <sub>2</sub> balanced with Ar, WHSV of 100000 mL g <sup>-1</sup> h <sup>-1</sup>                                                        | T <sub>100</sub> = 450 °C                                                                            | S. Xie, D. Kim, K. Ye, L. Tetard and F. Liu, <i>J. Rare Earth.</i> , 2023, <b>41</b> , 941-951.                                                                                                                                          |
| deN <sub>2</sub> O | Rh/CeO <sub>2</sub>                                            | 200 ppm N <sub>2</sub> O balanced with N <sub>2</sub> , GHSV of 30 000 h <sup>-1</sup>                                                                                  | 98% N <sub>2</sub> O conversion at 400 °C                                                            | Y. Li, A. Sundermann, O. Gerlach, K.-B. Low, C. C. Zhang, X. Zheng, H. Zhu and S. Axnanda, <i>Catal. Today</i> , 2020, <b>355</b> , 608-619.                                                                                             |
| deN <sub>2</sub> O | Aged Rh/CeO <sub>2</sub>                                       | 200 ppm N <sub>2</sub> O balanced with N <sub>2</sub> , WHSV of 250,000 cm <sup>3</sup> g <sup>-1</sup> h <sup>-1</sup>                                                 | 92% N <sub>2</sub> O conversion at 400 °C                                                            | H. Zhu, Y. Li and X. Zheng, <i>Appl. Catal. A-Gen.</i> , 2019, <b>571</b> , 89-95.                                                                                                                                                       |
| deN <sub>2</sub> O | (5 wt.%) RhOx/ZrO <sub>2</sub>                                 | 1000 ppm N <sub>2</sub> O, 10% O <sub>2</sub> , 2% H <sub>2</sub> O balanced with He, total flow rate of 100 mL min <sup>-1</sup>                                       | r <sub>N2O</sub> = 2.40 mmol g <sup>-1</sup> h <sup>-1</sup> at 350 °C                               | Y. Jing, K. Taketoshi, N. Zhang, C. He, T. Toyao, Z. Maeno, T. Ohori, N. Ishikawa and K.-i. Shimizu, <i>ACS Catal.</i> , 2022, <b>12</b> , 6325-6333.                                                                                    |
| deN <sub>2</sub> O | Rh/Ce-ZrO <sub>2</sub>                                         | 500 ppm N <sub>2</sub> O in N <sub>2</sub> , GHSV = 45000 h <sup>-1</sup>                                                                                               | 66.1% N <sub>2</sub> O conversion at 225 °C                                                          | M.-J. Kim, H. J. Kim, S.-J. Lee, I.-S. Ryu, H. C. Yoon, K. B. Lee and S. G. Jeon, <i>Catal. Commun.</i> , 2019, <b>130</b> , 105764.                                                                                                     |
| deN <sub>2</sub> O | Rh/CeZrOx                                                      | 2200 ppm N <sub>2</sub> O balanced with He, total                                                                                                                       | T <sub>100</sub> ≈ 300 °C<br>T <sub>100</sub> = 450 °C                                               | C. Moreau, Á. Caravaca, P. Vernoux and                                                                                                                                                                                                   |

|                    |                                                                     |                                                                                                                                          |                                                                                                                 |                                                                                                                                                                       |
|--------------------|---------------------------------------------------------------------|------------------------------------------------------------------------------------------------------------------------------------------|-----------------------------------------------------------------------------------------------------------------|-----------------------------------------------------------------------------------------------------------------------------------------------------------------------|
|                    |                                                                     | flow rate of 10 L h <sup>-1</sup>                                                                                                        |                                                                                                                 | S. Gil, <i>ChemCatChem</i> , 2020, <b>12</b> , 3042-3049.                                                                                                             |
| deN <sub>2</sub> O | Ru/Al <sub>2</sub> O <sub>3</sub>                                   | 500 ppm N <sub>2</sub> O, GHSV of 11000 h <sup>-1</sup>                                                                                  | T <sub>100</sub> = 450 °C                                                                                       | Sui, F. Yuan, Z. Zhang, C. Zhang, X. Niu and Y. Zhu, <i>Catalysts</i> , 2016, <b>6</b> , 173.                                                                         |
| deN <sub>2</sub> O | RhO <sub>x</sub> /Ag/Al <sub>2</sub> O <sub>3</sub>                 | 0.1% N <sub>2</sub> O balanced with He, total flow rate of 100 mL min <sup>-1</sup>                                                      | T <sub>100</sub> = 400 °C                                                                                       | Y. Jing, C. He, N. Zhang, Y. Murano, R. Toyoshima, H. Kondoh, Y. Kageyama, H. Inomata, T. Toyao and K.-i. Shimizu, <i>ACS Catal.</i> , 2023, <b>13</b> , 12983-12993. |
| deN <sub>2</sub> O | (1 wt.%) Rh/Zn–Al <sub>2</sub> O <sub>3</sub> -800                  | 0.5% N <sub>2</sub> O balanced with He, total flow rate of 60 mL min <sup>-1</sup>                                                       | T <sub>50</sub> = 251 °C                                                                                        | C. Huang, Z. Ma, C. Miao, Y. Yue, W. Hua and Z. Gao, <i>RSC Adv.</i> , 2017, <b>7</b> , 4243-4252.                                                                    |
| deN <sub>2</sub> O | (1 wt.%) Rh/La <sub>10</sub> Si <sub>6-x</sub> FexO <sub>27-δ</sub> | 0.5 vol.% N <sub>2</sub> O balanced with He                                                                                              | T <sub>100</sub> = 600 °C                                                                                       | N. Nunotani, R. Nagai and N. Imanaka, <i>Catal. Commun.</i> , 2016, <b>87</b> , 53-56.                                                                                |
| deN <sub>2</sub> O | (3.1 wt.%) RhO <sub>x</sub> /Ca–P–O                                 | 0.5 vol.% N <sub>2</sub> O balanced with He, flow rate of 60 mL min <sup>-1</sup>                                                        | T <sub>100</sub> = 300 °C                                                                                       | Y. Lin, T. Meng and Z. Ma, <i>J. Ind. Eng. Chem.</i> , 2015, <b>28</b> , 138-146.                                                                                     |
| deN <sub>2</sub> O | (1 wt.%) Rh/Al-KIT-6                                                | 1700 ppm N <sub>2</sub> O balanced with He, flow rate of 100 mL min <sup>-1</sup> , GHSV = 26500 h <sup>-1</sup>                         | T <sub>50</sub> = 350 °C, T <sub>90</sub> = 375 °C                                                              | M. Hussain, D. Fino and N. Russo, <i>Chem. Eng. J.</i> , 2014, <b>238</b> , 198-205.                                                                                  |
| deN <sub>2</sub> O | Rh/Mg/Al                                                            | 1000 ppm N <sub>2</sub> O balanced with N <sub>2</sub> , GHSV of 6800 h <sup>-1</sup>                                                    | T <sub>100</sub> = 400 °C                                                                                       | P. H. Ho, M. Jabłońska, R. Palkovits, E. Rodríguez-Castellón, F. Ospitali, G. Fornasari, A. Vaccari and P. Benito, <i>Chem. Eng. J.</i> , 2020, <b>379</b> , 122259.  |
| deN <sub>2</sub> O | Fe@Rh/ SBA-15                                                       | 10% N <sub>2</sub> O, GHSV = 5625 h <sup>-1</sup>                                                                                        | T <sub>100</sub> = 400 °C                                                                                       | H. Chen, Q. Lu, C. Yi, B. Yang and S. Qi, <i>Phys. Chem. Chem. Phys.</i> , 2018, <b>20</b> , 5103-5111.                                                               |
| deN <sub>2</sub> O | Au/Fe <sub>2</sub> O <sub>3</sub>                                   | 1000 ppm N <sub>2</sub> O balanced with He, total gas flow rate of 150 cm <sup>3</sup> min <sup>-1</sup> , GHSV = 40 000 h <sup>-1</sup> | r <sub>N<sub>2</sub>O</sub> = 185 nmol m <sup>-2</sup> s <sup>-1</sup> at 700 °C                                | S. A. C. Carabineiro, E. Papista, G. E. Marnellos, P. B. Tavares, F. J. Maldonado-Hódar and M. Konsolakis, <i>Mol. Catal.</i> , 2017, <b>436</b> , 78-89.             |
| deN <sub>2</sub> O | RuO <sub>2</sub>                                                    | 1.5 mbar N <sub>2</sub> O in He, total gas flow of 50 ml STP min <sup>-1</sup>                                                           | T <sub>100</sub> = 450 °C                                                                                       | M. Santiago, V. A. Kondratenko, E. V. Kondratenko, N. López and J. Pérez-Ramírez, <i>Appl. Catal., B-Environ.</i> , 2011, <b>110</b> , 33-39.                         |
| deN <sub>2</sub> O | Ru/Al <sub>2</sub> O <sub>3</sub>                                   | 500 ppm N <sub>2</sub> O, GHSV of 11 000 h <sup>-1</sup>                                                                                 | T <sub>100</sub> = 450 °C                                                                                       | C. Sui, F. Yuan, Z. Zhang, C. Zhang, X. Niu and Y. Zhu, <i>Catalysts</i> , 2016, <b>6</b> , 173.                                                                      |
| deN <sub>2</sub> O | (1 wt.%) RuO <sub>x</sub> /Ca–P–O                                   | 0.5 vol.% N <sub>2</sub> O balanced with He, total gas flow rate of 60 mL min <sup>-1</sup>                                              | T <sub>100</sub> = 400 °C                                                                                       | Y. Cui, H. Liu, Y. Lin and Z. Ma, <i>J. Taiwan Inst. Chem. E.</i> , 2016, <b>67</b> , 254-262.                                                                        |
| deN <sub>2</sub> O | RuO <sub>2</sub> /r-TiO <sub>2</sub>                                | 30 vol.% N <sub>2</sub> O balanced with Ar, WHSV = 30 000 mL g <sub>cat</sub> <sup>-1</sup> h <sup>-1</sup>                              | r <sub>N<sub>2</sub>O</sub> = 2.30 mol min <sup>-1</sup> mol <sub>RuO<sub>2</sub></sub> <sup>-1</sup> at 220 °C | Q. Lin, Y. Huang, Y. Wang, L. Li, X. Y. Liu, F. Lv, A. Wang, W.-C. Li and T. Zhang, <i>J. Mater. Chem. A</i> , 2014, <b>2</b> , 5178-5181.                            |
| deN <sub>2</sub> O | Ag/Yb <sub>2</sub> O <sub>3</sub>                                   | 1400 ppm N <sub>2</sub> O, 900 ppm NO, total gas flow rate of 4–6 Ndm <sup>3</sup> h <sup>-1</sup>                                       | 83% N <sub>2</sub> O conversion at 500 °C                                                                       | M. Konkol, M. Kondracka, P. Kowalik, W. Próchniak, K. Michalska, A. Schwedt, C. Merckens and U. Englert, <i>Appl. Catal., B-</i>                                      |

|                    |                                                                       |                                                                                                                                                        |                                                                    |                                                                                                                                                                                                                               |
|--------------------|-----------------------------------------------------------------------|--------------------------------------------------------------------------------------------------------------------------------------------------------|--------------------------------------------------------------------|-------------------------------------------------------------------------------------------------------------------------------------------------------------------------------------------------------------------------------|
| deN <sub>2</sub> O | Pt-K/SiO <sub>2</sub>                                                 | 2000 ppm of N <sub>2</sub> O balanced with He,, GHSV = 15 000 h <sup>-1</sup>                                                                          | 71% N <sub>2</sub> O conversion at 600 °C                          | <i>Environ.</i> , 2016, <b>190</b> , 85-92.<br>B. Bozorgi, J. Karimi-Sabet and P. Khadiv-Parsi, <i>Environ. Technol. Inno.</i> , 2022, <b>26</b> , 102344.                                                                    |
| deN <sub>2</sub> O | Pt <sub>1</sub> /MgAl <sub>1.2</sub> Fe <sub>0.8</sub> O <sub>4</sub> | 1000 ppm N <sub>2</sub> O balanced with Ar, total gas flow rate of 33.3 mL min <sup>-1</sup>                                                           | T <sub>100</sub> = 600 °C                                          | K. Liu, Y. Tang, Z. Yu, B. Ge, G. Ren, Y. Ren, Y. Su, J. Zhang, X. Sun, Z. Chen, X. Liu, B. Qiao, W.-Z. Li, A. Wang and J. Li, <i>Sci. China Mater.</i> , 2020, <b>63</b> , 949-958.                                          |
| deN <sub>2</sub> O | Co <sub>3</sub> O <sub>4</sub>                                        | 5% N <sub>2</sub> O in He, total flow rate of 30 mL min <sup>-1</sup>                                                                                  | T <sub>50</sub> = 320 °C                                           | P. Stelmachowski, K. Ciura and G. Grzybek, <i>Catal. Sci. Technol.</i> , 2016, <b>6</b> , 5554-5560.                                                                                                                          |
| deN <sub>2</sub> O | Co <sub>3</sub> O <sub>4</sub>                                        | 5% N <sub>2</sub> O in He, total flow rate of 30 mL min <sup>-1</sup>                                                                                  | T <sub>50</sub> ≈ 375 °C                                           | P. Stelmachowski, K. Ciura and G. Grzybek, <i>Catal. Sci. Technol.</i> , 2016, <b>6</b> , 5554-5560.                                                                                                                          |
| deN <sub>2</sub> O | Co <sub>3</sub> O <sub>4</sub>                                        | 5% N <sub>2</sub> O in He, total flow rate of 30 mL min <sup>-1</sup>                                                                                  | T <sub>50</sub> ≈ 360 °C                                           | P. Stelmachowski, K. Ciura and G. Grzybek, <i>Catal. Sci. Technol.</i> , 2016, <b>6</b> , 5554-5560.                                                                                                                          |
| deN <sub>2</sub> O | Co <sub>3</sub> O <sub>4</sub>                                        | 0.1 mol % N <sub>2</sub> O in N <sub>2</sub> , total flow rate of 100 mL min <sup>-1</sup> , WHSV = 60 m <sup>3</sup> kg <sup>-1</sup> h <sup>-1</sup> | 80% N <sub>2</sub> O conversion at 450 °C                          | A. Klegova, A. Inayat, P. Indyka, J. Gryboś, Z. Sojka, K. Pacultová, W. Schwieger, A. Volodarskaja, P. Kuśtrowski, A. Rokicińska, D. Fridrichová and L. Obalová, <i>Appl. Catal., B-Environ.</i> , 2019, <b>255</b> , 117745. |
| deN <sub>2</sub> O | Co <sub>3</sub> O <sub>4</sub>                                        | 1000 ppm N <sub>2</sub> O balanced with Ar, total flow rate of 50 mL min <sup>-1</sup> , GHSV = 10000 h <sup>-1</sup>                                  | T <sub>50</sub> = 460 °C, T <sub>90</sub> = 520 °C                 | X. Hu, Y. Wang, R. Wu and Y. Zhao, <i>Mol. Catal.</i> , 2021, <b>509</b> , 111656.                                                                                                                                            |
| deN <sub>2</sub> O | Co <sub>3</sub> O <sub>4</sub>                                        | 0.65 vol % N <sub>2</sub> O, 0.88 vol % O <sub>2</sub> , and N <sub>2</sub> balance, GHSV of 55,000 h <sup>-1</sup>                                    | T <sub>10</sub> = 378 °C, T <sub>90</sub> = 533 °C                 | J. Sun, A. Song, Y. Tian, H. Zhan, J. Deng, H. Wang and M. Ke, <i>ChemCatChem</i> , 2023, <b>15</b> , 1-10.                                                                                                                   |
| deN <sub>2</sub> O | Co <sub>3</sub> O <sub>4</sub>                                        | 1000 ppm N <sub>2</sub> O balanced with Ar, GHSV = 10000 h <sup>-1</sup>                                                                               | T <sub>50</sub> = 310 °C, T <sub>100</sub> = 380 °C                | Y. Wang, X. Hu, K. Zheng, X. Wei and Y. Zhao, <i>Catal. Commun.</i> , 2018, <b>111</b> , 70-74.                                                                                                                               |
| deN <sub>2</sub> O | Co <sub>3</sub> O <sub>4</sub>                                        | 1000 ppm N <sub>2</sub> O balanced with Ar, GHSV = 10000 h <sup>-1</sup>                                                                               | T <sub>100</sub> = 400 °C                                          | Y. Wang, K. Zheng, X. Hu, W. Zhou, X. Wei and Y. Zhao, <i>Mol. Catal.</i> , 2019, <b>470</b> , 104-111.                                                                                                                       |
| deN <sub>2</sub> O | 3.0F-Co <sub>3</sub> O <sub>4</sub>                                   | 2000 ppmv N <sub>2</sub> O/Ar (with 5 vol % O <sub>2</sub> , 100 ppmv NO and 2 vol% H <sub>2</sub> O), GHSV = 20,000 h <sup>-1</sup>                   | T <sub>90</sub> = 371 °C no impurity gas; T <sub>90</sub> = 433 °C | H. Yu, X. Qi, X. Du, Y. Pan, X. Feng, W. Shan and Y. Xiong, <i>Mol. Catal.</i> , 2023, <b>537</b> , 112960.                                                                                                                   |
| deN <sub>2</sub> O | N-Co <sub>3</sub> O <sub>4</sub>                                      | 1000 ppm N <sub>2</sub> O in Ar, total flow rate of 50 mL min <sup>-1</sup> , GHSV = 10000 h <sup>-1</sup>                                             | T <sub>50</sub> = 320 °C, T <sub>90</sub> = 360 °C                 | X. Hu, Y. Wang, R. Wu and Y. Zhao, <i>Mol. Catal.</i> , 2021, <b>509</b> , 111656.                                                                                                                                            |
| deN <sub>2</sub> O | Pr <sub>0.06</sub> -Doped Co <sub>3</sub> O <sub>4</sub>              | 2000 ppm N <sub>2</sub> O, GHSV = 60 000 mL·g <sup>-1</sup> ·h <sup>-1</sup>                                                                           | T <sub>50</sub> = 320 °C, T <sub>90</sub> = 367 °C                 | H. Liu, S. Yang, G. Wang, H. Liu, Y. Peng, C. Sun, J. Li and J. Chen, <i>Environ. Sci. Technol.</i> , 2022, <b>56</b> , 16325-16335.                                                                                          |
| deN <sub>2</sub> O | Na-Co <sub>3</sub> O <sub>4</sub>                                     | 0.65 vol % N <sub>2</sub> O, 0.88 vol % O <sub>2</sub> , and                                                                                           | T <sub>10</sub> = 322 °C                                           | J. Sun, A. Song, Y. Tian, H. Zhan, J.                                                                                                                                                                                         |

|                    |                                                                                 |                                                                                                                                                                                        |                                                                                                                             |                  |                                                                                                                                                           |
|--------------------|---------------------------------------------------------------------------------|----------------------------------------------------------------------------------------------------------------------------------------------------------------------------------------|-----------------------------------------------------------------------------------------------------------------------------|------------------|-----------------------------------------------------------------------------------------------------------------------------------------------------------|
|                    |                                                                                 | N <sub>2</sub> balance, GHSV = 55,000 h <sup>-1</sup>                                                                                                                                  |                                                                                                                             |                  | Deng, H. Wang and M. Ke, <i>ChemCatChem</i> , 2023, <b>15</b> , 1-10.                                                                                     |
| deN <sub>2</sub> O | K/Co <sub>3</sub> O <sub>4</sub>                                                | 500 ppm N <sub>2</sub> O in N <sub>2</sub> , GHSV = 45000 h <sup>-1</sup>                                                                                                              | T <sub>100</sub> ≈ 360 °C                                                                                                   |                  | M.-J. Kim, S.-J. Lee, I.-S. Ryu, S.-H. Moon, M.-W. Jeon, C. H. Ko and S. G. Jeon, <i>Catal. Lett.</i> , 2017, <b>147</b> , 2886-2892.                     |
| deN <sub>2</sub> O | Cs/Co <sub>3</sub> O <sub>4</sub>                                               | 1000 ppm N <sub>2</sub> O, 3% O <sub>2</sub> balanced with N <sub>2</sub> , total flow rate of 100 mL min <sup>-1</sup> , GHSV = 30000 h <sup>-1</sup>                                 | More than 90% conversion at 300 °C                                                                                          | N <sub>2</sub> O | F. Zhao, D. Wang, X. Li, Y. Yin, C. Wang, L. Qiu, J. Yu and H. Chang, <i>Ind. Eng. Chem. Res.</i> , 2022, <b>61</b> , 13854-13862.                        |
| deN <sub>2</sub> O | Gd <sub>0.06</sub> Co                                                           | 2000 ppmv N <sub>2</sub> O in Ar, total flow rate of 50 mL min <sup>-1</sup> , GHSV = 20000 h <sup>-1</sup>                                                                            | T <sub>100</sub> < 350 °C                                                                                                   |                  | Y. Xiong, Y. Zhao, X. Qi, J. Qi, Y. Cui, H. Yu and Y. Cao, <i>Environ. Sci. Technol.</i> , 2021, <b>55</b> , 13335-13344.                                 |
| deN <sub>2</sub> O | Sm-Co <sub>3</sub> O <sub>4</sub>                                               | 1000 ppm N <sub>2</sub> O in N <sub>2</sub> , total flow rate of 100 mL min <sup>-1</sup> , GHSV = 60000 h <sup>-1</sup>                                                               | T <sub>90</sub> ≈ 375 °C                                                                                                    |                  | H. Liu, J. Chen, Y. Wang, S. Xiong, Z. Su, Y. Wang, W. Yang, X. Chu, W. Yang, Y. Peng, W. Si and J. Li, <i>Chem. Eng. J.</i> , 2021, <b>414</b> , 128643. |
| deN <sub>2</sub> O | Alkaline-earth metal-modified A <sub>0.5</sub> Co <sub>2.5</sub> O <sub>4</sub> | 0.65% N <sub>2</sub> O, 0.88% O <sub>2</sub> in N <sub>2</sub> , total flow rate of 80 mL min <sup>-1</sup> , GHSV = 55000 h <sup>-1</sup>                                             | T <sub>10</sub> = 378 °C, T <sub>90</sub> = 533 °C (Co <sub>3</sub> O <sub>4</sub> );<br>T <sub>90</sub> = 460 °C (A = Ba); |                  | J. Sun, L. Wang, L. Zhang, Y. Zhao, Y. Chi, H. Wang, C. Li, J. Liu and J. Liu, <i>ACS Appl. Energy Mater.</i> , 2021, <b>4</b> , 8496-8505.               |
| deN <sub>2</sub> O | K <sub>0.01</sub> Bi <sub>0.02</sub> Co                                         | 2000 ppm N <sub>2</sub> O in Ar, GHSV = 20000 h <sup>-1</sup>                                                                                                                          | 55% N <sub>2</sub> O conversion at 200 °C                                                                                   |                  | M. Tursun, B. Wang, Y. Jiang, H. Yu, X. Sun and X. Wang, <i>Chem. Res. Chinese U.</i> , 2016, <b>32</b> , 418-422.                                        |
| deN <sub>2</sub> O | SnO <sub>2</sub> -Co <sub>3</sub> O <sub>4</sub>                                | 1000 ppm N <sub>2</sub> O balanced with Ar, GHSV = 10000 h <sup>-1</sup>                                                                                                               | T <sub>100</sub> = 360 °C                                                                                                   |                  | Y. Wang, X. Hu, K. Zheng, X. Wei and Y. Zhao, <i>Catal. Commun.</i> , 2018, <b>111</b> , 70-74.                                                           |
| deN <sub>2</sub> O | NiO                                                                             | 2000 ppm N <sub>2</sub> O balanced with He, total flow rate of 200 cm <sup>3</sup> min <sup>-1</sup> , GHSV = 105000 h <sup>-1</sup>                                                   | T <sub>50</sub> = 392 °C, T <sub>90</sub> = 467 °C                                                                          |                  | Z. Liu, Z. Zhou, F. He, B. Chen, Y. Zhao and Q. Xu, <i>Catal. Today</i> , 2017, <b>293-294</b> , 56-60.                                                   |
| deN <sub>2</sub> O | NiO                                                                             | 500 ppm N <sub>2</sub> O in He, total flow rate of 200 mL min <sup>-1</sup> , W/F value of 0.15 g s cm <sup>-3</sup>                                                                   | T <sub>50</sub> = 409 °C, 70% conversion at 500 °C                                                                          | N <sub>2</sub> O | B. Abu-Zied, S. Bawaked, S. Kosa and W. Schwieger, <i>Catalysts</i> , 2016, <b>6</b> , 70.                                                                |
| deN <sub>2</sub> O | Gd/NiO                                                                          | 500 ppm N <sub>2</sub> O in He, total flow rate of 200 mL min <sup>-1</sup> , W/F value of 0.15 g s cm <sup>-3</sup>                                                                   | T <sub>50</sub> = 333 °C,<br>T <sub>100</sub> = 500 °C                                                                      |                  | Abu-Zied, S. Bawaked, S. Kosa and W. Schwieger, <i>Catalysts</i> , 2016, <b>6</b> , 70.                                                                   |
| deN <sub>2</sub> O | Bi <sub>0.1</sub> NiO <sub>1.15</sub>                                           | 200 ppm N <sub>2</sub> O, 1% O <sub>2</sub> balanced with N <sub>2</sub> , total flow rate of 3.1 L min <sup>-1</sup> , GHSV = 45000 h <sup>-1</sup>                                   | T <sub>50</sub> = 328 °C, T <sub>90</sub> = 385 °C                                                                          |                  | M. X. Xu, H. X. Wang, H. D. Ouyang, L. Zhao and Q. Lu, <i>J. Hazard. Mater.</i> , 2021, <b>401</b> , 123334.                                              |
| deN <sub>2</sub> O | Cd <sub>0.04</sub> Ni                                                           | 1000 ppm N <sub>2</sub> O, % O <sub>2</sub> balanced with N <sub>2</sub> , GHSV= 30000 h <sup>-1</sup>                                                                                 | T <sub>90</sub> = 350 °C                                                                                                    |                  | F. Zhao, C. Wang, D. Wang, Y. Yin, J. Yu, J. Han, J. Zeng and H. Chang, <i>Appl. Catal. A-Gen.</i> , 2023, <b>649</b> , 118946.                           |
| deN <sub>2</sub> O | Sm <sub>0.06</sub> Ni                                                           | 2000 ppmv N <sub>2</sub> O, 5 vol.% O <sub>2</sub> , 100 ppmv NO, 5 vol.% H <sub>2</sub> O balanced with Ar, total flow rate of 50 mL min <sup>-1</sup> , GHSV = 20000 h <sup>-1</sup> | T <sub>100</sub> = 400 °C (when only 5 vol.% H <sub>2</sub> O);<br>76 % N <sub>2</sub> O conversion at 400 °C               |                  | J. Qi, X. Qi, Y. Pan, J. Cui, Y. Xiong, W. Shan and H. Yu, <i>Appl. Surf. Sci.</i> , 2023, <b>611</b> , 155657.                                           |
| deN <sub>2</sub> O | 8% Ni/CeO <sub>2</sub> -NR                                                      | 2% N <sub>2</sub> O in He, GHSV = 19 000 h <sup>-1</sup>                                                                                                                               | T <sub>50</sub> = 350 °C                                                                                                    |                  | P. Zhao, F. Qin, Z. Huang, C. Sun, W.                                                                                                                     |

|                    |                                                    |                                                                                                                                   |                                                                                                                      |                                                                                                                           |
|--------------------|----------------------------------------------------|-----------------------------------------------------------------------------------------------------------------------------------|----------------------------------------------------------------------------------------------------------------------|---------------------------------------------------------------------------------------------------------------------------|
| deN <sub>2</sub> O | NiO@CeO <sub>2</sub> -HPOC                         | 2% N <sub>2</sub> O in He, GHSV = 19 000 h <sup>-1</sup>                                                                          | T <sub>90</sub> = 400 °C                                                                                             | Shen and H. Xu, <i>Catal. Sci. Technol.</i> , 2018, <b>8</b> , 276-288.                                                   |
| deN <sub>2</sub> O | NiO@CeO <sub>2</sub> -HPOC                         | 2% N <sub>2</sub> O, 2% O <sub>2</sub> in He, GHSV = 19 000 h <sup>-1</sup>                                                       | T <sub>100</sub> = 450 °C                                                                                            | P. Zhao, F. Qin, Z. Huang, C. Sun, W. Shen and H. Xu, <i>Chem. Eng. J.</i> , 2018, <b>349</b> , 72-81.                    |
| deN <sub>2</sub> O | NiO/CeO <sub>2</sub> -C                            | 2% N <sub>2</sub> O in He, GHSV = 19 000 h <sup>-1</sup>                                                                          | T <sub>90</sub> = 475 °C                                                                                             | P. Zhao, F. Qin, Z. Huang, C. Sun, W. Shen and H. Xu, <i>Chem. Eng. J.</i> , 2018, <b>349</b> , 72-81.                    |
| deN <sub>2</sub> O | NiO/CeO <sub>2</sub> -C                            | 2% N <sub>2</sub> O, 2% O <sub>2</sub> in He, GHSV = 19 000 h <sup>-1</sup>                                                       | T <sub>100</sub> > 500 °C                                                                                            | P. Zhao, F. Qin, Z. Huang, C. Sun, W. Shen and H. Xu, <i>Chem. Eng. J.</i> , 2018, <b>349</b> , 72-81.                    |
| deN <sub>2</sub> O | Cu/Si-Al hollow sphere                             | 0.5% N <sub>2</sub> O in Ar, total flow rate of 50 mL min <sup>-1</sup>                                                           | > 80% N <sub>2</sub> O conversion at 400 °C                                                                          | T. Umegaki, M. Dobashi, T. Komuro and Y. Kojima, <i>New J. Chem.</i> , 2022, <b>46</b> , 11166-11173.                     |
| deN <sub>2</sub> O | (10 wt.%) Fe/Al <sub>2</sub> O <sub>3</sub>        | 1000 ppm N <sub>2</sub> O in He, total flow rate of 60 cm <sup>3</sup> min <sup>-1</sup>                                          | T <sub>100</sub> ≈ 650 °C                                                                                            | M. Haneda, M. Shinriki, Y. Nagao, Y. Kintaichi and H. Hamada, <i>Bull. Chem. Soc. Jpn.</i> , 2003, <b>76</b> , 2329-2333. |
| deN <sub>2</sub> O | Mn <sub>2</sub> O <sub>3</sub>                     | P <sub>N<sub>2</sub>O</sub> = 0.066 atm, total flow rate of 30 mL min <sup>-1</sup> , GHSV = 2000 h <sup>-1</sup>                 | r <sub>N<sub>2</sub>O</sub> = 4.8 * 10 <sup>-3</sup> mol min <sup>-1</sup> s <sup>-1</sup> m <sup>-2</sup> at 350 °C | T. Yamashita and A. Vannice, <i>J. Catal.</i> , 1996, <b>161</b> , 254-252.                                               |
| deN <sub>2</sub> O | Co <sub>3</sub> O <sub>4</sub> /m-ZrO <sub>2</sub> | 1000 ppm N <sub>2</sub> O in Ar, total flow rate of 50 mL min <sup>-1</sup> , GHSV = 10000 h <sup>-1</sup>                        | Nearly 80% N <sub>2</sub> O conversion at 400 °C                                                                     | X. Hu, Y. Wang, R. Wu, L. Zhao, X. Wei and Y. Zhao, <i>Appl. Surf. Sci.</i> , 2020, <b>514</b> , 145892.                  |
| deN <sub>2</sub> O | Co <sub>3</sub> O <sub>4</sub> /m-ZrO <sub>2</sub> | 1000 ppm N <sub>2</sub> O, 3% O <sub>2</sub> in Ar, total flow rate of 50 mL min <sup>-1</sup> , GHSV = 10000 h <sup>-1</sup>     | 62% N <sub>2</sub> O conversion at 400 °C                                                                            | X. Hu, Y. Wang, R. Wu, L. Zhao, X. Wei and Y. Zhao, <i>Appl. Surf. Sci.</i> , 2020, <b>514</b> , 145892.                  |
| deN <sub>2</sub> O | Co <sub>3</sub> O <sub>4</sub> /m-ZrO <sub>2</sub> | 1000 ppm N <sub>2</sub> O, 3.3% H <sub>2</sub> O in Ar, total flow rate of 50 mL min <sup>-1</sup> , GHSV = 10000 h <sup>-1</sup> | 57% N <sub>2</sub> O conversion at 400 °C                                                                            | X. Hu, Y. Wang, R. Wu, L. Zhao, X. Wei and Y. Zhao, <i>Appl. Surf. Sci.</i> , 2020, <b>514</b> , 145892.                  |
| deN <sub>2</sub> O | Co <sub>3</sub> O <sub>4</sub> /m-ZrO <sub>2</sub> | 1000 ppm N <sub>2</sub> O, 200 ppm NO in Ar, total flow rate of 50 mL min <sup>-1</sup> , GHSV = 10000 h <sup>-1</sup>            | 69% N <sub>2</sub> O conversion at 400 °C                                                                            | X. Hu, Y. Wang, R. Wu, L. Zhao, X. Wei and Y. Zhao, <i>Appl. Surf. Sci.</i> , 2020, <b>514</b> , 145892.                  |
| deN <sub>2</sub> O | Ba <sub>0.2</sub> Ce <sub>0.5</sub> Cu             | 2000 ppmv N <sub>2</sub> O in Ar, total flow rate of 50 mL min <sup>-1</sup> , GHSV = 20000 h <sup>-1</sup>                       | T <sub>100</sub> = 450 °C                                                                                            | Y. Li, X. Wang and C. Shi, <i>J. Environ. Chem. Eng.</i> , 2023, <b>11</b> , 109970.                                      |
| deN <sub>2</sub> O | Ba <sub>0.2</sub> Ce <sub>0.5</sub> Cu             | 2000 ppmv N <sub>2</sub> O, 1000 ppmv NO in Ar, total flow rate of 50 mL min <sup>-1</sup> , GHSV = 20000 h <sup>-1</sup>         | T <sub>90</sub> = 450 °C                                                                                             | Y. Li, X. Wang and C. Shi, <i>J. Environ. Chem. Eng.</i> , 2023, <b>11</b> , 109970.                                      |
| deN <sub>2</sub> O | Cu/Ce <sub>0.5</sub> Y <sub>0.5</sub>              | 450 ppm N <sub>2</sub> O in N <sub>2</sub> , total flow rate of 500 mL min <sup>-1</sup>                                          | T <sub>100</sub> = 500 °C                                                                                            | S. Choi, K. Bok Nam, H. Phil Ha and D. Wook Kwon, <i>J. Ind. Eng. Chem.</i> , 2023, <b>121</b> , 462-471.                 |
| deN <sub>2</sub> O | ZrO <sub>2</sub> -Y <sub>2</sub> O <sub>3</sub>    | 0.5 vol.% N <sub>2</sub> O in He, total flow rate of                                                                              | T <sub>100</sub> ≈ 800 °C                                                                                            | C.-M. Cho, N. Nunotani and N. Imanaka,                                                                                    |

|                    |                                                                    |                                                                                                                                                                                                                                                                                                                 |                                                    |                                                                                                                                                                                                |
|--------------------|--------------------------------------------------------------------|-----------------------------------------------------------------------------------------------------------------------------------------------------------------------------------------------------------------------------------------------------------------------------------------------------------------|----------------------------------------------------|------------------------------------------------------------------------------------------------------------------------------------------------------------------------------------------------|
| deN <sub>2</sub> O | CuO–Co <sub>3</sub> O <sub>4</sub>                                 | 660 mL min <sup>-1</sup> , weight/gas flow rate (W/F) ratio of 0.2 g s mL <sup>-1</sup><br>1000 ppm N <sub>2</sub> O balanced with N <sub>2</sub> , total flow rate of 100 mL min <sup>-1</sup> , GHSV of 60 000 cm <sup>3</sup> g <sup>-1</sup> h <sup>-1</sup>                                                | T <sub>100</sub> = 375 °C                          | <i>J. Asian Ceram. Soc.</i> , 2019, <b>7</b> , 518-523.                                                                                                                                        |
| deN <sub>2</sub> O | Y <sub>2</sub> O <sub>3</sub> -Co <sub>3</sub> O <sub>4</sub>      | 1000 ppm N <sub>2</sub> O balanced with Ar, GHSV of 10000 h <sup>-1</sup>                                                                                                                                                                                                                                       | T <sub>100</sub> = 360 °C                          | S. Xiong, J. Chen, N. Huang, S. Yang, Y. Peng and J. Li, <i>Environ. Sci. Technol.</i> , 2019, <b>53</b> , 10379-10386.                                                                        |
| deN <sub>2</sub> O | (Yb <sub>1-x</sub> Co <sub>x</sub> ) <sub>2</sub> O <sub>3-δ</sub> | 5000 ppm N <sub>2</sub> O balanced with He, total flow rate of 60 mL min <sup>-1</sup> , weight/gas flow rate (W/F) ratio of 0.2 g s mL <sup>-1</sup><br>1000 ppm N <sub>2</sub> O balanced with Ar, total flow rate of 150 mL min <sup>-1</sup> , GHSV = 12700 cm <sup>3</sup> g <sup>-1</sup> h <sup>-1</sup> | T <sub>100</sub> = 500 °C                          | Y. Wang, K. Zheng, X. Hu, W. Zhou, X. Wei and Y. Zhao, <i>Mol. Catal.</i> , 2019, <b>470</b> , 104-111.                                                                                        |
| deN <sub>2</sub> O | K/Y <sub>2</sub> O <sub>3</sub> -Co <sub>3</sub> O <sub>4</sub>    | 1000 ppm N <sub>2</sub> O balanced with Ar, total flow rate of 150 mL min <sup>-1</sup> , GHSV = 12700 cm <sup>3</sup> g <sup>-1</sup> h <sup>-1</sup>                                                                                                                                                          | T <sub>100</sub> = 350 °C                          | C.-M. Cho, N. Nunotani and N. Imanaka, <i>Bull. Chem. Soc. Jpn.</i> , 2019, <b>92</b> , 1148-1153.                                                                                             |
| deN <sub>2</sub> O | PrBaCoO <sub>3</sub>                                               | 1% N <sub>2</sub> O in He, total flow rate of 100 mL min <sup>-1</sup> , GHSV = 38 000 h <sup>-1</sup>                                                                                                                                                                                                          | T <sub>50</sub> = 410 °C                           | T. Zhao, Y. Li, Q. Gao, Z. Liu and X. Xu, <i>Catal. Commun.</i> , 2020, <b>137</b> , 105948.                                                                                                   |
| deN <sub>2</sub> O | Co <sub>3</sub> O <sub>4</sub> /CeO <sub>2</sub>                   | 1000 ppm N <sub>2</sub> O, total flow rate of 150 cm <sup>3</sup> min <sup>-1</sup> , GHSV = 40000 h <sup>-1</sup>                                                                                                                                                                                              | T <sub>100</sub> = 500 °C                          | N. Richards, J. H. Carter, L. A. Parker, S. Pattison, D. G. Hewes, D. J. Morgan, T. E. Davies, N. F. Dummer, S. Golunski and G. J. Hutchings, <i>ACS Catal.</i> , 2020, <b>10</b> , 5430-5442. |
| deN <sub>2</sub> O | CoCe <sub>0.05</sub>                                               | 1000 ppm N <sub>2</sub> O in Ar, flow rate of 150 cm <sup>3</sup> min <sup>-1</sup> , space velocity of 0.2 g s cm <sup>-3</sup>                                                                                                                                                                                | T <sub>100</sub> ≈ 275 °C                          | M. Lykaki, E. Papista, N. Kaklidis, S. Carabineiro and M. Konsolakis, <i>Catalysts</i> , 2019, <b>9</b> , 233.                                                                                 |
| deN <sub>2</sub> O | Ce-Co-O                                                            | 1000 ppm N <sub>2</sub> O in He, total flow rate of 300 mL min <sup>-1</sup> , GHSV = 80000 h <sup>-1</sup>                                                                                                                                                                                                     | T <sub>50</sub> = 304 °C, T <sub>90</sub> = 359 °C | L. Xue, C. Zhang, H. He and Y. Teraoka, <i>Appl. Catal., B-Environ.</i> , 2007, <b>75</b> , 167-174.                                                                                           |
| deN <sub>2</sub> O | K/Co-CeO <sub>2</sub>                                              | 500 ppm N <sub>2</sub> O in N <sub>2</sub> , GHSV of 45000 h <sup>-1</sup>                                                                                                                                                                                                                                      | T <sub>100</sub> = 375 °C                          | Y. You, H. Chang, L. Ma, L. Guo, X. Qin, J. Li and J. Li, <i>Chem. Eng. J.</i> , 2018, <b>347</b> , 184-192.                                                                                   |
| deN <sub>2</sub> O | K/Co <sub>3</sub> O <sub>4</sub> -CeO <sub>2</sub>                 | 1000 ppm N <sub>2</sub> O in Ar, flow rate of 150 cm <sup>3</sup> min <sup>-1</sup> , space velocity of 0.2 g s cm <sup>-3</sup>                                                                                                                                                                                | T <sub>100</sub> ≈ 280 °C                          | M.-J. Kim, S.-J. Lee, I.-S. Ryu, M.-W. Jeon, S.-H. Moon, H.-S. Roh and S. G. Jeon, <i>Mol. Catal.</i> , 2017, <b>442</b> , 202-207.                                                            |
| deN <sub>2</sub> O | Cs/Co <sub>3</sub> O <sub>4</sub> -CeO <sub>2</sub>                | 1000 ppm N <sub>2</sub> O in Ar, flow rate of 150 cm <sup>3</sup> min <sup>-1</sup> , space velocity of 0.2 g s cm <sup>-3</sup>                                                                                                                                                                                | T <sub>100</sub> ≈ 300 °C                          | L. Xue, C. Zhang, H. He and Y. Teraoka, <i>Catal. Today</i> , 2007, <b>126</b> , 449-455.                                                                                                      |
| deN <sub>2</sub> O | NiO-CeO <sub>2</sub>                                               | 2000 ppm N <sub>2</sub> O balanced with He, total flow rate of 200 cm <sup>3</sup> min <sup>-1</sup> , GHSV of 105000 h <sup>-1</sup>                                                                                                                                                                           | T <sub>50</sub> = 367 °C, T <sub>90</sub> = 424 °C | L. Xue, H. He, C. Liu, C. Zhang and B. Zhang, <i>Environ. Sci. Technol.</i> , 2009, <b>43</b> , 890-895.                                                                                       |
| deN <sub>2</sub> O | CuO/CeO <sub>2</sub>                                               | 2500 ppm N <sub>2</sub> O in Ar, total flow rate of 100 mL min <sup>-1</sup> , WHSV of 120 L g <sub>cat</sub> <sup>-1</sup> h <sup>-1</sup>                                                                                                                                                                     | T <sub>50</sub> ≈ 420 °C                           | Z. Liu, Z. Zhou, F. He, B. Chen, Y. Zhao and Q. Xu, <i>Catal. Today</i> , 2017, <b>293-294</b> , 56-60.                                                                                        |

M. Zabilskiy, I. Arčon, P. Djinić, E. Tchernychova and A. Pintar,

|                    |                                                                                                  |                                                                                                                                                      |                                                                                                                                        |                                                                                                                                                                                                     |
|--------------------|--------------------------------------------------------------------------------------------------|------------------------------------------------------------------------------------------------------------------------------------------------------|----------------------------------------------------------------------------------------------------------------------------------------|-----------------------------------------------------------------------------------------------------------------------------------------------------------------------------------------------------|
| deN <sub>2</sub> O | Co <sub>3</sub> O <sub>4</sub> /70Mg30Al                                                         | 1000 ppm N <sub>2</sub> O in N <sub>2</sub> , GHSV = 10 L h <sup>-1</sup> g <sup>-1</sup>                                                            | T <sub>100</sub> = 425 °C                                                                                                              | <i>ChemCatChem</i> , 2021, <b>13</b> , 1814-1823.<br>A. Klegová, K. Pacultová, D. Fridrichová, A. Volodarskaja, F. Kovanda and K. Jirátová, <i>Chem. Eng. Technol.</i> , 2017, <b>40</b> , 981-990. |
| deN <sub>2</sub> O | K or Cs doped Zn <sub>0.4</sub> Co <sub>2.6</sub> O <sub>4</sub>  Al <sub>2</sub> O <sub>3</sub> | 5% N <sub>2</sub> O in He, total flow rate of 30 mL min <sup>-1</sup> , GHSV = 7000 h <sup>-1</sup>                                                  | T <sub>50</sub> ≈ 350 °C                                                                                                               | K. Ciura, G. Grzybek, S. Wójcik, P. Indyka, A. Kotarba and Z. Sojka, <i>React. Kinet. Catal.</i> , 2017, <b>121</b> , 645-655.                                                                      |
| deN <sub>2</sub> O | K-Co <sub>2.6</sub> Zn <sub>0.4</sub> O <sub>4</sub>  α-Al <sub>2</sub> O <sub>3</sub>           | 5% N <sub>2</sub> O in He, GHSV of 7000 h <sup>-1</sup>                                                                                              | T <sub>100</sub> ≈ 500 °C                                                                                                              | G. Grzybek, S. Wójcik, P. Legutko, J. Gryboś, P. Indyka, B. Leszczyński, A. Kotarba and Z. Sojka, <i>Appl. Catal., B-Environ.</i> , 2017, <b>205</b> , 597-604.                                     |
| deN <sub>2</sub> O | Cu-Zn/γ-Al <sub>2</sub> O <sub>3</sub>                                                           | 12 vol.% N <sub>2</sub> O, 16.8 vol.% O <sub>2</sub> in N <sub>2</sub> , total flow rate of 120 mL min <sup>-1</sup> , GHSV of 7200 h <sup>-1</sup>  | T <sub>100</sub> = 601 °C                                                                                                              | R. Zhang, C. Hua, B. Wang and Y. Jiang, <i>Catalysts</i> , 2016, <b>6</b> , 200.                                                                                                                    |
| deN <sub>2</sub> O | Cu-Zn/ZnAl <sub>2</sub> O <sub>4</sub>                                                           | 8.1 vol.% N <sub>2</sub> O, 10.2 vol.% O <sub>2</sub> in N <sub>2</sub> , total flow rate of 1200 mL min <sup>-1</sup> , GHSV = 1200 h <sup>-1</sup> | T <sub>100</sub> = 650 °C                                                                                                              | X. Zheng, R. Zhang, F. Bai and C. Hua, <i>Catalysts</i> , 2017, <b>7</b> , 166.                                                                                                                     |
| deN <sub>2</sub> O | MgCo <sub>2</sub> O <sub>4</sub>                                                                 | 500 ppm N <sub>2</sub> O, total flow rate of 200 cm <sup>3</sup> min <sup>-1</sup>                                                                   | T <sub>50</sub> = 467 °C; 67% N <sub>2</sub> O conversion at 500 °C                                                                    | B. M. Abu-Zied, <i>Chinese J. Catal.</i> , 2011, <b>32</b> , 264-272.                                                                                                                               |
| deN <sub>2</sub> O | Alkali promoted MgCo <sub>2</sub> O <sub>4</sub>                                                 | 500 ppm N <sub>2</sub> O, total flow rate of 200 cm <sup>3</sup> min <sup>-1</sup>                                                                   | T <sub>50</sub> = 405 °C (Li-);<br>T <sub>50</sub> = 374 °C (Na-);<br>T <sub>50</sub> = 308 °C (K-);<br>T <sub>50</sub> = 332 °C (Cs-) | B. M. Abu-Zied, <i>Chinese J. Catal.</i> , 2011, <b>32</b> , 264-272.                                                                                                                               |
| deN <sub>2</sub> O | Co <sub>3</sub> O <sub>4</sub> /MgO-Al <sub>2</sub> O <sub>3</sub>                               | 2000 ppmv N <sub>2</sub> O in Ar, total flow rate of 50 mL min <sup>-1</sup>                                                                         | T <sub>100</sub> ≈ 600 °C                                                                                                              | Y. Li and X. Wang, <i>Catal. Lett.</i> , 2019, <b>149</b> , 1856-1863.                                                                                                                              |
| deN <sub>2</sub> O | Mg <sub>0.9</sub> Co <sub>0.1</sub> Co <sub>2</sub> O <sub>4</sub>                               | 10 mol% N <sub>2</sub> O in He, total flow rate of 35 mL min <sup>-1</sup> , GHSV of 21200 h <sup>-1</sup>                                           | r <sub>N<sub>2</sub>O</sub> = 30.6-38.9 mmol g <sup>-1</sup> h <sup>-1</sup> at 380 – 400 °C                                           | U. Chellam, Z. P. Xu and H. C. Zeng, <i>Chem. Mater</i> , 2000, <b>12</b> , 650-658.                                                                                                                |
| deN <sub>2</sub> O | Mn <sub>0.1725</sub> Co <sub>3</sub> AlO <sub>x</sub>                                            | 0.1% N <sub>2</sub> O in N <sub>2</sub> , total flow rate of 100 cm <sup>3</sup> min <sup>-1</sup> , WHSV of 17 L h <sup>-1</sup> g <sup>-1</sup>    | T <sub>50</sub> = 305 °C<br>T <sub>100</sub> = 400 °C                                                                                  | M. Jabłońska, M. A. Arán, A. M. Beale, G. Delahay, C. Petitto, M. Nocuń and R. Palkovits, <i>Appl. Catal., B-Environ.</i> , 2019, <b>243</b> , 66-75.                                               |
| deN <sub>2</sub> O | CoFe <sub>2</sub> O <sub>4</sub>                                                                 | 1% N <sub>2</sub> O in N <sub>2</sub> , GHSV of 20000 h <sup>-1</sup>                                                                                | 98.1% N <sub>2</sub> O conversion at 475 °C                                                                                            | K. Denisova, A. A. Ilyin, R. Rumyantsev, J. Sakharova, A. P. Ilyin and N. Gordina, <i>Catalysts</i> , 2021, <b>11</b> , 889.                                                                        |
| deN <sub>2</sub> O | LaFeO <sub>3</sub>                                                                               | 100% N <sub>2</sub> O, GHSV of 10 000 h <sup>-1</sup>                                                                                                | T <sub>100</sub> = 700 °C                                                                                                              | E. M. Kostyukhin, A. L. Kustov, N. V. Evdokimenko, A. I. Bazlov and L. M. Kustov, <i>J. Am. Ceram. Soc.</i> , 2020, <b>104</b> , 492-503.                                                           |
| deN <sub>2</sub> O | La <sub>0.75</sub> Sr <sub>0.25</sub> FeO <sub>3</sub>                                           | 60.0 cm <sup>3</sup> min <sup>-1</sup> with ratio N <sub>2</sub> O:He = 10:90                                                                        | T <sub>100</sub> = 575 °C                                                                                                              | A. G. Margellou, T. C. Vaimakis, P. J. Pomonis and D. E. Petrakis, <i>React. Kinet. Catal.</i> , 2019, <b>127</b> , 825-838.                                                                        |
| deN <sub>2</sub> O | LaCo <sub>0.8</sub> Fe <sub>0.2</sub> O <sub>3</sub>                                             | 0.1 vol.% N <sub>2</sub> O, 5 vol.% NO, 6 vol.% O <sub>2</sub> ,                                                                                     | T <sub>50</sub> = 563 °C                                                                                                               | Y. Wu, X. Ni, A. Beaurain, C. Dujardin and                                                                                                                                                          |



|                    |                                                                                   |                                                                                                                                                                                                                                                                                                                        |                                                     |  |                                                                                                                                                                                                                               |
|--------------------|-----------------------------------------------------------------------------------|------------------------------------------------------------------------------------------------------------------------------------------------------------------------------------------------------------------------------------------------------------------------------------------------------------------------|-----------------------------------------------------|--|-------------------------------------------------------------------------------------------------------------------------------------------------------------------------------------------------------------------------------|
| deN <sub>2</sub> O | 10 wt.% Fe <sub>2</sub> O <sub>3</sub> -ZrO <sub>2</sub>                          | 15 vol.% H <sub>2</sub> O in He, total flow rate of 15 L h <sup>-1</sup> , GHSV of 30000 h <sup>-1</sup><br>1000 ppm N <sub>2</sub> O in He, total flow rate of 150 cm <sup>3</sup> min <sup>-1</sup> , weight/gas flow rate (W/F) ratio of 0.2 g s mL <sup>-1</sup>                                                   | Nearly 95% N <sub>2</sub> O conversion at 550 °C    |  | P. Granger, <i>Appl. Catal., B-Environ.</i> , 2012, <b>125</b> , 149-157.<br>S. N. Basahel, M. Mokhtar, T. T. Ali and K. Narasimharao, <i>Catal. Today</i> , 2020, <b>348</b> , 166-176.                                      |
| deN <sub>2</sub> O | K doped Co-Mn-Al mixed oxide                                                      | 0.1% N <sub>2</sub> O in He, GHSV of 40380 h <sup>-1</sup>                                                                                                                                                                                                                                                             | T <sub>100</sub> = 420 °C                           |  | L. Obalová, K. Karásková, K. JirátoVá and F. Kovanda, <i>Appl. Catal., B-Environ.</i> , 2009, <b>90</b> , 132-140.                                                                                                            |
| deN <sub>2</sub> O | Co-Mn-Al mixed oxide                                                              | 1000 ppm N <sub>2</sub> O in He, total flow rate of 100 mL min <sup>-1</sup>                                                                                                                                                                                                                                           | More than 80% N <sub>2</sub> O conversion at 420 °C |  | L. Obalová, K. Pacultová, J. Balabánová, K. JirátoVá, Z. Bastl, M. Valášková, Z. Lacný and F. Kovanda, <i>Catal. Today</i> , 2007, <b>119</b> , 233-238.                                                                      |
| deN <sub>2</sub> O | Co <sub>3</sub> O <sub>4</sub> on open-cell metallic foam                         | 1000 ppm N <sub>2</sub> O in N <sub>2</sub> , total flow rate of 80 mL min <sup>-1</sup> , GHSV of 6800 h <sup>-1</sup>                                                                                                                                                                                                | T <sub>50</sub> = 460 °C                            |  | P. H. Ho, K. S. Da Costa, G. S. de Luna, M. Jabłońska, F. Ospitali, F. Di Renzo, G. Delahay, G. Fornasari, A. Vaccari, R. Palkovits and P. Benito, <i>Chem. Eng. Res. Des.</i> , 2022, <b>188</b> , 166-178.                  |
| deN <sub>2</sub> O | Co <sub>4</sub> MnAlOx/SiC-s.m                                                    | 0.1 mol % N <sub>2</sub> O in N <sub>2</sub> , total flow rate of 700 mL min <sup>-1</sup> , GHSV of 3000 m <sup>3</sup> m <sub>bed</sub> <sup>-3</sup> h <sup>-1</sup>                                                                                                                                                | 40% N <sub>2</sub> O conversion at 450 °C           |  | A. Klegova, A. Inayat, P. Indyka, J. Gryboś, Z. Sojka, K. Pacultová, W. Schwieger, A. Volodarskaja, P. Kuśtrowski, A. Rokicińska, D. Fridrichová and L. Obalová, <i>Appl. Catal., B-Environ.</i> , 2019, <b>255</b> , 117745. |
| deN <sub>2</sub> O | Co <sub>3</sub> O <sub>4</sub> -Cs on an open-cell foam                           | 1000 ppm N <sub>2</sub> O in N <sub>2</sub> and VHSV = 1500 m <sup>3</sup> m <sub>bed</sub> <sup>-3</sup> h <sup>-1</sup> ; or 1000 ppm N <sub>2</sub> O, 2 mol % H <sub>2</sub> O, 5 mol % O <sub>2</sub> , 200 ppm NO in N <sub>2</sub> and VHSV = 510 m <sup>3</sup> m <sub>bed</sub> <sup>-3</sup> h <sup>-1</sup> | > 87% N <sub>2</sub> O conversion at 450 °C         |  | A. Klegova, K. Pacultová, T. Kiška and L. Obalová, <i>Ind. Eng. Chem. Res.</i> , 2023, <b>62</b> , 1301-1309.                                                                                                                 |
| deN <sub>2</sub> O | Co <sub>3</sub> O <sub>4</sub> -Cs (1 wt.%) on ceramic open-cell foams            | 1000 ppm N <sub>2</sub> O in N <sub>2</sub> and GHSV = 15000 m <sup>3</sup> m <sub>bed</sub> <sup>-3</sup> h <sup>-1</sup>                                                                                                                                                                                             | > 90% N <sub>2</sub> O conversion at 450 °C         |  | K. Pacultová, A. Klegova, T. Kiška, D. Fridrichová, A. Martaus, A. Rokicińska, P. Kuśtrowski and L. Obalová, <i>Mater. Res. Bull.</i> , 2020, <b>129</b> , 110892.                                                            |
| deN <sub>2</sub> O | Co-Cs/MgOc/Al <sub>2</sub> O <sub>3</sub>                                         | 0.1 mol.% N <sub>2</sub> O in N <sub>2</sub> , GHSV = 1500 m <sup>3</sup> m <sub>bed</sub> <sup>-3</sup> h <sup>-1</sup>                                                                                                                                                                                               | More than 90% N <sub>2</sub> O conversion at 450 °C |  | A. Klegova, K. Pacultová, T. Kiška, P. Peikertová, A. Rokicińska, P. Kuśtrowski and L. Obalová, <i>Mol. Catal.</i> , 2022, <b>533</b> , 112754.                                                                               |
| deN <sub>2</sub> O | Co <sub>3</sub> O <sub>4</sub>  α-Al <sub>2</sub> O <sub>3</sub>  cordierite      | 5% N <sub>2</sub> O in He, total flow rate of 30 mL min <sup>-1</sup> , GHSV = 1600 h <sup>-1</sup>                                                                                                                                                                                                                    | More than 80% N <sub>2</sub> O conversion at 500 °C |  | S. Wójcik, G. Ercolino, M. Gajewska, C. W. M. Quintero, S. Specchia and A. Kotarba, <i>Chem. Eng. J.</i> , 2019, <b>377</b> , 120088.                                                                                         |
| deN <sub>2</sub> O | K-Pb-Co <sub>3</sub> O <sub>4</sub>  α-Al <sub>2</sub> O <sub>3</sub>  cordierite | 5% N <sub>2</sub> O in He, total flow rate of 30 mL min <sup>-1</sup> , GHSV = 7000 h <sup>-1</sup>                                                                                                                                                                                                                    | More than 80% N <sub>2</sub> O conversion at 400 °C |  | S. Wójcik, P. Indyka, Z. Sojka and A. Kotarba, <i>Catal. Today</i> , 2020, <b>348</b> , 111-117.                                                                                                                              |
| deN <sub>2</sub> O | K-Zn <sub>0.4</sub> Co <sub>2.6</sub> O <sub>4</sub>  α-                          | 1.5% N <sub>2</sub> O, 1% NO <sub>x</sub> , 1% H <sub>2</sub> O, 2.0% O <sub>2</sub>                                                                                                                                                                                                                                   | More than 90% N <sub>2</sub> O conversion at 400 °C |  | S. Wójcik, G. Grzybek, J. Gryboś, A.                                                                                                                                                                                          |

|                    |                                            |                                                                                                                                                                                                                  |                                                                                                    |                                                                                                                                        |
|--------------------|--------------------------------------------|------------------------------------------------------------------------------------------------------------------------------------------------------------------------------------------------------------------|----------------------------------------------------------------------------------------------------|----------------------------------------------------------------------------------------------------------------------------------------|
|                    | Al <sub>2</sub> O <sub>3</sub>  cordierite | in He, total flow rate of 90 mL min <sup>-1</sup>                                                                                                                                                                | conversion at T < 400 °C                                                                           | Kotarba and Z. Sojka, <i>Catal. Commun.</i> , 2018, <b>110</b> , 64-67.                                                                |
| deN <sub>2</sub> O | NiCoAl/SiC                                 | 20 vol.% N <sub>2</sub> O in Ar, WHSV = 5 h <sup>-1</sup> or 20 h <sup>-1</sup>                                                                                                                                  | T <sub>100</sub> = 420 °C (20 h <sup>-1</sup> );<br>T <sub>100</sub> = 340 °C (5 h <sup>-1</sup> ) | O. Muccioli, E. Meloni, S. Renda, M. Martino, F. Brandani, P. Pullumbi and V. Palma, <i>Processes</i> , 2023, <b>11</b> , 1511.        |
| deN <sub>2</sub> O | Fe-BEA monolith catalysts                  | N <sub>2</sub> O: He: O <sub>2</sub> = 35: 60: 5, GHSV = 4000 h <sup>-1</sup>                                                                                                                                    | T <sub>100</sub> ≈ 500 °C                                                                          | R. Zhang, K. Hedjazi, B. Chen, Y. Li, Z. Lei and N. Liu, <i>Catal. Today</i> , 2016, <b>273</b> , 273-285.                             |
| deN <sub>2</sub> O | Fe/ZSM-5                                   | 0.3 mbar N <sub>2</sub> O, 60 mbar O <sub>2</sub> , 0.1 mbar NO, 0.14 mbar CO, 0.1 mbar SO <sub>2</sub> , and 100 mbar H <sub>2</sub> O in He, W/F <sup>o</sup> (N <sub>2</sub> O) of 1245 g h mol <sup>-1</sup> | T <sub>100</sub> ≈ 650 °C                                                                          | M. Santiago, M. A. G. Hevia and J. Pérez-Ramírez, <i>Appl. Catal., B-Environ.</i> , 2009, <b>90</b> , 83-88.                           |
| deN <sub>2</sub> O | Fe-ZSM-5                                   | 1.2 vol.% N <sub>2</sub> O in He, total flow rate of 20 mL min <sup>-1</sup>                                                                                                                                     | T <sub>100</sub> = 525 °C                                                                          | X. Liang, H. Tang, F. Yang, G. Tu, F. Zhang, Q. Xiao, Y. Zhong and W. Zhu, <i>Micropor. Mesopor. Mat.</i> , 2019, <b>290</b> , 109655. |
| deN <sub>2</sub> O | Fe-ZSM-5                                   | 1500 ppm N <sub>2</sub> O in Ar, GHSV = 35000 h <sup>-1</sup>                                                                                                                                                    | T <sub>90</sub> = 620 °C                                                                           | G. He, B. Zhang, H. He, X. Chen and Y. Shan, <i>Sci Total Environ</i> , 2019, <b>673</b> , 266-271.                                    |
| deN <sub>2</sub> O | Fe/ZSM-5                                   | 0.15 vol.%N <sub>2</sub> O in He, GHSV = 35000 h <sup>-1</sup>                                                                                                                                                   | more than 90% N <sub>2</sub> O conversion at 525 °C                                                | B. Zhang, F. Liu, H. He and L. Xue, <i>Chinese J. Catal.</i> , 2014, <b>35</b> , 1972-1981.                                            |
| deN <sub>2</sub> O | Fe-ZSM-5                                   | 5% O <sub>2</sub> , 5000 ppm N <sub>2</sub> O in Ar, total flow rate of 200 mL min <sup>-1</sup> , GHSV = 30000 h <sup>-1</sup>                                                                                  | 75% of conversion at 500 °C                                                                        | M. Wu, H. Wang, L. Zhong, X. Zhang, Z. Hao, Q. Shen, W. Wei, G. Qian and Y. Sun, <i>Chinese J. Catal.</i> , 2016, <b>37</b> , 898-907. |
| deN <sub>2</sub> O | Fe-ZSM-5                                   | 500 ppm N <sub>2</sub> O in He; total flow rate of 125 cm <sup>3</sup> min <sup>-1</sup>                                                                                                                         | T <sub>100</sub> ≈ 450 °C                                                                          | B. M. Abu-Zied, W. Schwieger and A. Unger, <i>Appl. Catal., B-Environ.</i> , 2008, <b>84</b> , 277-288.                                |
| deN <sub>2</sub> O | Co/Beta                                    | 30 vol % N <sub>2</sub> O, GHSV = 30 000 h <sup>-1</sup>                                                                                                                                                         | About 99.6% of conversion at 450 °C                                                                | B. Kang, R. Zhang, M. Guo, X. Guo, Z. Di, Y. Wei and J. Jia, <i>Energy Fuels</i> , 2023, <b>37</b> , 18019-18029.                      |
| deN <sub>2</sub> O | Fe-beta                                    | 5% O <sub>2</sub> , 5000 ppm N <sub>2</sub> O in Ar, total flow rate of 200 mL min <sup>-1</sup> , GHSV = 30000 h <sup>-1</sup>                                                                                  | T <sub>90</sub> = 425 °C                                                                           | M. Wu, H. Wang, L. Zhong, X. Zhang, Z. Hao, Q. Shen, W. Wei, G. Qian and Y. Sun, <i>Chinese J. Catal.</i> , 2016, <b>37</b> , 898-907. |
| deN <sub>2</sub> O | Co-ZSM-5                                   | 30% N <sub>2</sub> O in He, total flow rate of 80 mL min <sup>-1</sup> , GHSV = 30000 h <sup>-1</sup>                                                                                                            | More than 90% of conversion at 500 °C                                                              | B. Kang, M. Li, Z. Di, X. Guo, Y. Wei, J. Jia and R. Zhang, <i>Catal. Today</i> , 2022, <b>402</b> , 17-26.                            |
| deN <sub>2</sub> O | Cu/ZSM-5                                   | 1 vol.% N <sub>2</sub> O in He, GHSV = 12000 h <sup>-1</sup>                                                                                                                                                     | T <sub>50</sub> = 368 °C                                                                           | G. A. Zenkovets, R. A. Shutilov, V. I. Sobolev and V. Y. Gavrilov, <i>Catal. Commun.</i> , 2020, <b>144</b> , 106072.                  |
| deN <sub>2</sub> O | CuZSM-5                                    | 1 vol.% N <sub>2</sub> O in He, GHSV = 6000 h <sup>-1</sup>                                                                                                                                                      | T <sub>50</sub> = 520 °C<br>T <sub>100</sub> = 580 °C                                              | S. A. Yashnik, A. V. Salnikov, N. T. Vasenin, V. F. Anufrienko and Z. R.                                                               |

|                     |                                                   |                                                                                                                                              |                                                       |                  |                                                                                                                                                                                                                |
|---------------------|---------------------------------------------------|----------------------------------------------------------------------------------------------------------------------------------------------|-------------------------------------------------------|------------------|----------------------------------------------------------------------------------------------------------------------------------------------------------------------------------------------------------------|
| deN <sub>2</sub> O  | Fe-FER                                            | 1000 ppm N <sub>2</sub> O, 0.5% NO, 2% O <sub>2</sub> , 10% H <sub>2</sub> O and He, GHSV = 3.5 × 10 <sup>5</sup> h <sup>-1</sup>            | T <sub>100</sub> = 600 °C                             |                  | Ismagilov, <i>Catal. Today</i> , 2012, <b>197</b> , 214-227.                                                                                                                                                   |
| deN <sub>2</sub> O  | Fe-FER                                            | 1000 ppm N <sub>2</sub> O, 0.5% NO, 2% O <sub>2</sub> and 10% H <sub>2</sub> O in He, GHSV = 3.5 × 10 <sup>5</sup> h <sup>-1</sup>           | T <sub>50</sub> = 435 °C                              |                  | G. Sádovská, E. Tabor, P. Sazama, M. Lhotka, M. Bernauer and Z. Sobalík, <i>Catal. Commun.</i> , 2017, <b>89</b> , 133-137.                                                                                    |
| deN <sub>2</sub> O  | Fe/CHA                                            | 500 ppm N <sub>2</sub> O, 5% H <sub>2</sub> O and Ar, total flow rate of 200 mL min <sup>-1</sup> , GHSV ≈ 400000 h <sup>-1</sup>            | More than 80% of conversion at 600 °C                 |                  | G. Sádovská, M. Bernauer, B. Bernauer, E. Tabor, A. Vondrová and Z. Sobalík, <i>Catal. Commun.</i> , 2018, <b>112</b> , 58-62.                                                                                 |
| deN <sub>2</sub> O  | Fe-FAU                                            | 1500 ppm N <sub>2</sub> O in He, total flow rate of 60 mL min <sup>-1</sup> , GHSV = 30000 h <sup>-1</sup>                                   | T <sub>50</sub> = 397 °C<br>T <sub>100</sub> = 477 °C |                  | T. Zhang, Y. Qiu, G. Liu, J. Chen, Y. Peng, B. Liu and J. Li, <i>J. Catal.</i> , 2020, <b>392</b> , 322-335.                                                                                                   |
| deN <sub>2</sub> O  | Fe-PST-7(HS)                                      | 1000 ppm N <sub>2</sub> O, 4% O <sub>2</sub> in He, GHSV = 42000 h <sup>-1</sup>                                                             | T <sub>50</sub> = 710 K                               |                  | L. Li, Q. Shen, J. Li, Z. Hao, Z. P. Xu and G. Q. M. Lu, <i>Appl. Catal. A-Gen.</i> , 2008, <b>344</b> , 131-141.                                                                                              |
| deN <sub>2</sub> O  | Ru + Co/US-Y                                      | 5000 ppm N <sub>2</sub> O in He, total flow rate of 60 mL min <sup>-1</sup> , GHSV = 36000 h <sup>-1</sup>                                   | T <sub>90</sub> = 310 °C                              |                  | J. B. Lim, S. H. Cha and S. B. Hong, <i>Appl. Catal., B-Environ.</i> , 2019, <b>243</b> , 750-759.                                                                                                             |
| deN <sub>2</sub> O  | Mg–Al–Fe–LDHs                                     | 1000 ppm N <sub>2</sub> O, GHSV = 2:17 cm <sup>3</sup> <sub>NTP</sub> g <sub>cat</sub> <sup>-1</sup> s <sup>-1</sup>                         | More than 80% conversion at 500 °C                    | N <sub>2</sub> O | N. Labhsetwar, M. Dhakad, R. Biniwale, T. Mitsushashi, H. Haneda, P. S. S. Reddy, S. Bakardjieva, J. Subrt, S. Kumar, V. Kumar, P. Sai prasad and S. Rayalu, <i>Catal. Today</i> , 2009, <b>141</b> , 205-210. |
| deN <sub>2</sub> O  | Co/CoO <sub>x</sub> @Carbon                       | 200 ppm N <sub>2</sub> O in N <sub>2</sub> , total flow rate of 300 mL min <sup>-1</sup> , GHSV = 30000 h <sup>-1</sup>                      | T <sub>50</sub> = 305 °C<br>T <sub>100</sub> ≈ 400 °C |                  | T. J. Vulic, A. F. K. Reitzmann and K. Lázár, <i>Chem. Eng. J.</i> , 2012, <b>207-208</b> , 913-922.                                                                                                           |
| deN <sub>2</sub> O  | Co/nHAP                                           | 1000 ppm N <sub>2</sub> O in Ar, total flow rate of 75 mL min <sup>-1</sup> , GHSV = 15000 h <sup>-1</sup>                                   | T <sub>100</sub> = 460 °C                             |                  | H. Tang, Y. He, P. Liu, J. Shao, F. Lin and Z. Wang, <i>Energy Fuels</i> , 2021, <b>35</b> , 18664-18679.                                                                                                      |
| deN <sub>2</sub> O  | Co <sub>3</sub> O <sub>4</sub> /BaCO <sub>3</sub> | 2000 ppmv N <sub>2</sub> O in Ar, GHSV = 20000 h <sup>-1</sup>                                                                               | T <sub>100</sub> = 400 °C                             |                  | X. Wei, Y. Wang, X. Li, R. Wu and Y. Zhao, <i>Mol. Catal.</i> , 2020, <b>491</b> , 111005.                                                                                                                     |
| deN <sub>2</sub> O  | Co <sub>3</sub> O <sub>4</sub> /CaCO <sub>3</sub> | 2000 ppmv N <sub>2</sub> O in Ar, GHSV = 20 000 h <sup>-1</sup>                                                                              | T <sub>100</sub> = 300 °C                             |                  | H. Yu, X. Wang and X. Wu, <i>Mol. Catal.</i> , 2018, <b>460</b> , 69-73.                                                                                                                                       |
| deN <sub>2</sub> O  | Co <sub>3</sub> O <sub>4</sub> /g-CN              | 1000 ppm N <sub>2</sub> O in Ar, total flow rate of 50 mL min <sup>-1</sup> , GHSV = 10000 h <sup>-1</sup>                                   | T <sub>100</sub> = 400 °C                             |                  | H. Yu, X. Wang and Y. Li, <i>Catal. Today</i> , 2020, <b>339</b> , 274-280.                                                                                                                                    |
| deN <sub>2</sub> O  | RuO <sub>x</sub> /HAP                             | 0.5 vol.% N <sub>2</sub> O in He, total flow rate of 60 mL min <sup>-1</sup>                                                                 | T <sub>100</sub> = 400 °C                             |                  | X. Hu, Y. Wang, R. Wu and Y. Zhao, <i>Appl. Surf. Sci.</i> , 2021, <b>538</b> , 148157.                                                                                                                        |
| H <sub>2</sub> -SCR | Ni-Pt/SiO <sub>2</sub>                            | 2500 ppm N <sub>2</sub> O, 2500 ppm H <sub>2</sub> , balanced by He, GHSV = 25000 h <sup>-1</sup>                                            | More than 80% conversion at 350 K                     | N <sub>2</sub> O | Y. Cui, H. Liu, Y. Lin and Z. Ma, <i>J. Taiwan Inst. Chem. E.</i> , 2016, <b>67</b> , 254-262.                                                                                                                 |
| H <sub>2</sub> -SCR | RuO <sub>2</sub>                                  | N <sub>2</sub> O (1.5 mbar), H <sub>2</sub> (1.5 mbar), balanced by He, other conditions: W/F (N <sub>2</sub> O) = 498 g h mol <sup>-1</sup> | 100% N <sub>2</sub> O conversion at 625 K             |                  | J. Arenas-Alatorre, A. Gómez-Cortés, M. Avalos-Borja and G. Díaz, <i>J. Phys. Chem. B</i> , 2005, <b>109</b> , 2371-2376.                                                                                      |

|                      |                                                              |                                                                                                                                                                     |                                            |                  |                                                                                                                                               |
|----------------------|--------------------------------------------------------------|---------------------------------------------------------------------------------------------------------------------------------------------------------------------|--------------------------------------------|------------------|-----------------------------------------------------------------------------------------------------------------------------------------------|
| CO-SCR               | Fe(97)-BEA                                                   | 0.2% N <sub>2</sub> O, 0.2% CO, 3% O <sub>2</sub> , ramp = 10 K/min <sup>-1</sup> , GHSV = 35000 h <sup>-1</sup>                                                    | More than 95% conversion at 480 °C         | N <sub>2</sub> O | <b>110</b> , 33-39.<br>G. Delahay, M. Mauvezin, A. Guzman-Vargas and B. J. C. C. Coq, <i>Catal. Commun.</i> , 2002, <b>3</b> , 385-389.       |
| CO-SCR               | 0.2 wt% Rh/Al <sub>2</sub> O <sub>3</sub>                    | CO and N <sub>2</sub> O of 5 × 10 <sup>-3</sup> atm and a space velocity of 25,000 h <sup>-1</sup>                                                                  | T <sub>50</sub> = 295 °C                   |                  | P. Granger, <i>J. Catal.</i> , 2004, <b>223</b> , 142-151.                                                                                    |
| CO-SCR               | Co-Pd-Al (1/0.1/1) htlc                                      | 12,500 ppm N <sub>2</sub> O, 17,500 ppm CO, GHSV = 30000 h <sup>-1</sup>                                                                                            | More than 95% conversion at 200 °C         | N <sub>2</sub> O | K. S. Chang, H.-J. Lee, Y.-S. Park and J.-W. Woo, <i>Appl. Catal. A-Gen.</i> , 2006, <b>309</b> , 129-138.                                    |
| CO-SCR               | Fe-ZSM-5                                                     | 1.5 mbar of N <sub>2</sub> O and 1.5 mbar of CO with He as balance, GHSV = 90000 h <sup>-1</sup>                                                                    | More than 90% conversion at 427 °C         | N <sub>2</sub> O | M. N. Debbagh, C. S. M. d. Lecea and J. Pérez-Ramírez, <i>Appl. Catal., B-Environ.</i> , 2007, <b>70</b> , 335-341.                           |
| CO-SCR               | Co-Mn-Al spinel                                              | 0.1 mol% N <sub>2</sub> O, 0.15 mol% CO, balanced by He, 330 mL/min, .033 g of catalyst                                                                             | More than 95% conversion at 350 °C         | N <sub>2</sub> O | K. Pacultová, L. Obalová, F. Kovanda and K. Jirátová, <i>Catal. Today</i> , 2008, <b>137</b> , 385-389.                                       |
| CO-SCR               | 0.5 wt% Rh/SiO <sub>2</sub>                                  | 1927 ppm N <sub>2</sub> O, 1980 ppm CO over 75 mg of 0.5 wt% Rh/SiO <sub>2</sub> , balance He with total flow rate of 100 cm <sup>3</sup> (STP)/min                 | More than 95% conversion at 350 °C         | N <sub>2</sub> O | N. W. Cant, C. C. Dean, and O. L. Irene, <i>J. Catal.</i> <b>2011</b> , 278, 162-166.                                                         |
| CO-SCR               | Synthetic coal char M6                                       | 420 μL L <sup>-1</sup> of N <sub>2</sub> O and CO of 0.45 vol.%, 0.1 g synthetic coal char M6                                                                       | More than 80% conversion at 600 °C         | N <sub>2</sub> O | C.A. Wang, Y. Du, and D. Che, <i>P. Combust. Inst.</i> <b>2015</b> , 35, 2323-2330.                                                           |
| CO-SCR               | Pt-Co <sub>3</sub> O <sub>4</sub> /CeO <sub>2</sub> (10:10%) | Mixture of CO and N <sub>2</sub> O in 1:1 vol.%, 35 cm <sup>3</sup> min <sup>-1</sup> of flow velocity, about 150 mg of catalyst                                    | T <sub>90</sub> = 210 °C                   |                  | Z. Z. Khan, I. A. Khan, I. Khan, M. H. Sarwar Wattoo and A. Badshah, <i>Solid State Sci.</i> , 2019, <b>98</b> , 106035.                      |
| CO-SCR               | Fe-Z-pH2 (Fe-ZSM-5 ion-exchanged under pH of 2)              | 1000 ppm N <sub>2</sub> O, 1000 ppm CO, the total gas flow of 100 ml/min, 0.3 g catalysts                                                                           | T <sub>90</sub> = 300 °C                   |                  | Y. You, S. Chen, J. Li, J. Zeng, H. Chang, L. Ma and J. Li, <i>J. Hazard. Mater.</i> , 2020, <b>383</b> , 121117.                             |
| NH <sub>3</sub> -SCR | RuO <sub>2</sub>                                             | 1.5 mbar N <sub>2</sub> O, 1.5 mbar NH <sub>3</sub> , 1.5 mbar H <sub>2</sub> , balanced with He,                                                                   | T <sub>100</sub> ≈ 623 K                   |                  | M. Santiago, V. A. Kondratenko, E. V. Kondratenko, N. López and J. Pérez-Ramírez, <i>Appl. Catal., B-Environ.</i> , 2011, <b>110</b> , 33-39. |
| NH <sub>3</sub> -SCR | Cu/SSM                                                       | 0.5% N <sub>2</sub> O, 5% NH <sub>3</sub> in Ar, total flow rate of 50 mL min <sup>-1</sup>                                                                         | T <sub>100</sub> = 400 °C                  |                  | T. Umegaki, D. Noguchi and T. Fukumoto, <i>ChemistrySelect</i> , 2022, <b>7</b> , 1-6.                                                        |
| NH <sub>3</sub> -SCR | Rh-FAU                                                       | 0.2 vol% N <sub>2</sub> O, 0.2% NH <sub>3</sub> , balance with He; total flow rate = 90 cm <sup>3</sup> min <sup>-1</sup> (space velocity: 30,000 h <sup>-1</sup> ) | 100% N <sub>2</sub> O conversion at 300 °C |                  | M. Mauvezin, G. Delahay, B. Coq, and S. Kieger, <i>Appl. Catal., B-Environ.</i> <b>1999</b> , 23, L79-L82.                                    |
| NH <sub>3</sub> -SCR | Fe(49)-BEA                                                   | N <sub>2</sub> O/O <sub>2</sub> /NH <sub>3</sub> /He 3% O <sub>2</sub> (0.2/3.0/0.2/96.6), GHSV = 35000 h <sup>-1</sup>                                             | T <sub>50</sub> = 392 °C                   |                  | M. Mauvezin, G. Delahay, F. Kisslich, B. Coq, and S. Kieger, <i>Catal. Lett.</i> <b>1999</b> , 62, 41-44.                                     |
| NH <sub>3</sub> -SCR | Fe-MOR                                                       | 5000 ppm N <sub>2</sub> O, 4000 ppm NH <sub>3</sub> , 5% O <sub>2</sub> , balanced with He. GHSV = 30 000 h <sup>-1</sup> .                                         | T <sub>100</sub> = 700 K                   |                  | X. Zhang, Q. Shen, C. He, C. Ma, J. Cheng, L. Li and Z. Hao, <i>ACS Catal.</i> , 2012, <b>2</b> , 512-520.                                    |
| NH <sub>3</sub> -SCR | Fe-MOR                                                       | 5000 ppm N <sub>2</sub> O, 4000 ppm NH <sub>3</sub> , 5% O <sub>2</sub> , balanced with He. GHSV = 30000 h <sup>-1</sup> .                                          | T <sub>90</sub> = 685 K                    |                  | X. Zhang, Q. Shen, C. He, C. Ma, J. Cheng and Z. Hao, <i>Catal. Commun.</i> ,                                                                 |

|                      |                                               |                                                                                                                                                                                                                                                                                                                                           |                                                                                                                                                                                                                                                                                                                                                    |                  |                                                                                                                                                                 |
|----------------------|-----------------------------------------------|-------------------------------------------------------------------------------------------------------------------------------------------------------------------------------------------------------------------------------------------------------------------------------------------------------------------------------------------|----------------------------------------------------------------------------------------------------------------------------------------------------------------------------------------------------------------------------------------------------------------------------------------------------------------------------------------------------|------------------|-----------------------------------------------------------------------------------------------------------------------------------------------------------------|
| NH <sub>3</sub> -SCR | Fe-BEA                                        | N <sub>2</sub> O/NH <sub>3</sub> /O <sub>2</sub> /He = 0.2/0.2/3/99.6, space velocity = 35000 h <sup>-1</sup>                                                                                                                                                                                                                             | More than 80% conversion at 427 °C                                                                                                                                                                                                                                                                                                                 | N <sub>2</sub> O | 2012, <b>18</b> , 151-155.<br>B. Coq, M. Mauvezin, G. Delahay and S. Kieger, <i>J. Catal.</i> , 2000, <b>195</b> , 298-303.                                     |
| NH <sub>3</sub> -SCR | Fe(97)BEAe                                    | N <sub>2</sub> O/O <sub>2</sub> /NH <sub>3</sub> /He (0.2/3.0/0.2/96.6), VVH=35,000 h <sup>-1</sup>                                                                                                                                                                                                                                       | T <sub>50</sub> = 380 °C                                                                                                                                                                                                                                                                                                                           |                  | G. Delahay, M. Mauvezin, B. Coq and S. J. J. o. C. Kieger, <i>J. Catal.</i> , 2001, <b>202</b> , 156-162.                                                       |
| NH <sub>3</sub> -SCR | Fe(100)-FER                                   | N <sub>2</sub> O/O <sub>2</sub> /NH <sub>3</sub> /He (0.2/3.0/0.2/96.6), GHSV: 35000 h <sup>-1</sup>                                                                                                                                                                                                                                      | More than 90% conversion at 457 °C                                                                                                                                                                                                                                                                                                                 | N <sub>2</sub> O | A. Guzmanvargas, <i>Appl. Catal., B-Environ.</i> , 2003, <b>42</b> , 369-379.                                                                                   |
| NH <sub>3</sub> -SCR | Fe(0.24)-MFI                                  | N <sub>2</sub> O (1000 ppm), NH <sub>3</sub> (670 ppm), balanced with He, 100 mg catalyst, total flow rate: 0.41 g h/mol                                                                                                                                                                                                                  | T <sub>100</sub> = 400 °C                                                                                                                                                                                                                                                                                                                          |                  | K. Sugawara, T. Nobukawa, M. Yoshida, Y. Sato, K. Okumura, K. Tomishige, and K. Kunimori, <i>Appl. Catal., B-Environ.</i> <b>2007</b> , <b>69</b> , 154-163.    |
| NH <sub>3</sub> -SCR | Fe/Beta (0.63 wt%)                            | 540 ppm of N <sub>2</sub> O, 360 ppm NH <sub>3</sub> and 2.5% H <sub>2</sub> O balanced with N <sub>2</sub> , GHSV = 200,000 h <sup>-1</sup>                                                                                                                                                                                              | More than 70% conversion at 400 °C                                                                                                                                                                                                                                                                                                                 | N <sub>2</sub> O | A. Wang, Y. Wang, E. D. Walter, R. K. Kukkadapu, Y. Guo, G. Lu, R. S. Weber, Y. Wang, C. H. F. Peden and F. Gao, <i>J. Catal.</i> , 2018, <b>358</b> , 199-210. |
| NH <sub>3</sub> -SCR | Fe-beta catalyst                              | 1670 ppm of NH <sub>3</sub> , 1000 ppm of N <sub>2</sub> O, 3% O <sub>2</sub> , balanced with N <sub>2</sub> , 0.15 g of catalysts, and a total flow rate of 100 mL min <sup>-1</sup>                                                                                                                                                     | T <sub>90</sub> = 400 °C                                                                                                                                                                                                                                                                                                                           |                  | J. Zeng, S. Chen, Z. Fan, C. Wang, H. Chang and J. Li, <i>Ind. Eng. Chem. Res.</i> , 2020, <b>59</b> , 19500-19509.                                             |
| NH <sub>3</sub> -SCR | 1% Fe-SSZ-13                                  | 500 ppm NH <sub>3</sub> , 1000 ppm N <sub>2</sub> O, 5% H <sub>2</sub> O, balanced with N <sub>2</sub> at a GHSV of 20,000 h <sup>-1</sup>                                                                                                                                                                                                | T <sub>90</sub> = 400 °C                                                                                                                                                                                                                                                                                                                           |                  | J. Cheng, D. Zheng, G. Yu, R. Xu, C. Dai, N. Liu, N. Wang and B. Chen, <i>ACS Catal.</i> , 2022, <b>13</b> , 934-947.                                           |
| HCS-SCR              | (10 wt.%) Fe/Al <sub>2</sub> O <sub>3</sub>   | 1000 ppm N <sub>2</sub> O, 1000 ppm CH <sub>4</sub> in He, total flow rate of 60 cm <sup>3</sup> min <sup>-1</sup>                                                                                                                                                                                                                        | T <sub>100</sub> ≈ 500 °C                                                                                                                                                                                                                                                                                                                          |                  | M. Haneda, M. Shinriki, Y. Nagao, Y. Kintaichi and H. Hamada, <i>Bull. Chem. Soc. Jpn.</i> , 2003, <b>76</b> , 2329-2333.                                       |
| HCS-SCR              | Fe-ZSM-5 supported on ceramic monoliths       | 500 ppmv N <sub>2</sub> O, 500 ppmv hydrocarbon, N <sub>2</sub> balance, GHSV = 12000 h <sup>-1</sup>                                                                                                                                                                                                                                     | T <sub>90</sub> = 382 °C (methane), T <sub>90</sub> = 400 °C (propane), T <sub>90</sub> = 478 °C (propene)                                                                                                                                                                                                                                         |                  | E. Ruiz-Martínez, J. M. Sánchez-Hervás and J. Otero-Ruiz, <i>Appl. Catal., B-Environ.</i> , 2004, <b>50</b> , 195-206.                                          |
| HCS-SCR              | The hydrotalcite-derived Mg-Cr-Fe-O catalysts | 0.8 vol% N <sub>2</sub> O and the N <sub>2</sub> O/EB molar ratio of 1:1), GHSV = 22000 h <sup>-1</sup>                                                                                                                                                                                                                                   | T <sub>50</sub> = 450 °C, T <sub>90</sub> = 500 °C                                                                                                                                                                                                                                                                                                 |                  | P. Kuśtrowski, L. Chmielarz, A. Rafalska-Łasocha, B. Dudek, A. Pattek-Janczyk and R. Dziembaj, <i>Catal. Commun.</i> , 2006, <b>7</b> , 1047-1052.              |
| HCS-SCR              | Fe-silicalite                                 | Mixtures of N <sub>2</sub> O: Xe = 1:1 (pump) and CH <sub>4</sub> :Ne = 1:1 (probe)<br>Conditions: the mixtures contain 1.5 mbar of N <sub>2</sub> O, 0.93 mbar of CH <sub>4</sub> , or 0.44 - 0.57 mbar of one of the other hydrocarbons, and 20 mbar of O <sub>2</sub> , the balance is He, P = 1 bar and GHSV = 60 000 h <sup>-1</sup> | More than 60% conversion at 450 °C                                                                                                                                                                                                                                                                                                                 | N <sub>2</sub> O | E. V. Kondratenko and J. Pérez-Ramírez, <i>Catal. Today</i> , 2007, <b>119</b> , 243-246.                                                                       |
| HCS-SCR              | FeZSM-5 (Si/Al = 31.3 and 0.67 wt% Fe)        | 500 ppmv N <sub>2</sub> O, 500 ppmv hydrocarbon, N <sub>2</sub> balance, GHSV = 12000 h <sup>-1</sup>                                                                                                                                                                                                                                     | T <sub>50</sub> = 340 °C (CH <sub>4</sub> ), T <sub>50</sub> = 332 °C (C <sub>2</sub> H <sub>6</sub> ), T <sub>50</sub> = 337 °C (C <sub>3</sub> H <sub>8</sub> ), T <sub>50</sub> = 342 °C (C <sub>2</sub> H <sub>4</sub> ), T <sub>50</sub> = 352 °C (C <sub>2</sub> H <sub>2</sub> ), T <sub>50</sub> = 362 °C (C <sub>3</sub> H <sub>4</sub> ) |                  | M. A. Hevia, and J. Perez-Ramirez, <i>Environ. Sci. Technol.</i> <b>2008</b> , <b>42</b> , 8896-8900.                                                           |
| HCS-SCR              | Co-MOR-104                                    | N <sub>2</sub> O:CH <sub>4</sub> :O <sub>2</sub> (4000:4000:20000 ppm), GHSV = 15000 h <sup>-1</sup> , He as balance                                                                                                                                                                                                                      | More than 80% conversion at 500 °C                                                                                                                                                                                                                                                                                                                 | N <sub>2</sub> O | M. C. Campa, D. Pietrogiaconi and M. Occhiuzzi, <i>Appl. Catal., B-Environ.</i> , 2015,                                                                         |

|                              |                                                           |                                                                                                                                                                                                      |                                                   |                  |                                                                                                                                                                                  |
|------------------------------|-----------------------------------------------------------|------------------------------------------------------------------------------------------------------------------------------------------------------------------------------------------------------|---------------------------------------------------|------------------|----------------------------------------------------------------------------------------------------------------------------------------------------------------------------------|
| HCs-SCR                      | CoO <sub>x</sub> supported on ZrO <sub>2</sub>            | N <sub>2</sub> O:C <sub>3</sub> H <sub>6</sub> :O <sub>2</sub> = 4000:2000:20000 ppm (v/v), GHSV = 24000, He as balance                                                                              | More than 80% conversion at 500 °C                | N <sub>2</sub> O | <b>168-169</b> , 293-302.<br>M. C. Campa, D. Pietrogiacomì, C. Scarfiello, L. R. Carbone and M. Occhiuzzi, <i>Appl. Catal., B-Environ.</i> , 2019, <b>240</b> , 367-372.         |
| HCs-SCR                      | CoO <sub>x</sub> /ZrO <sub>2</sub>                        | 4000 ppm N <sub>2</sub> O, 2000 ppm C <sub>3</sub> H <sub>6</sub> , 2000 ppm O <sub>2</sub> , total flow rate of 50 cm <sup>3</sup> <sub>STP</sub> /min <sup>-1</sup> , GHSV = 24000 h <sup>-1</sup> | About 80% N <sub>2</sub> O conversion at 750 K    |                  | D. Pietrogiacomì, M. C. Campa, L. R. M. C. Campa, D. Pietrogiacomì, C. Scarfiello, L. R. Carbone and M. Occhiuzzi, <i>Appl. Catal., B-Environ.</i> , 2019, <b>240</b> , 367-372. |
| HCs-SCR                      | Fe-MOR-64                                                 | 4000 ppm for N <sub>2</sub> O and CH <sub>4</sub> and 20000 ppm for O <sub>2</sub> , GHSV = 15000 h <sup>-1</sup> , He as balance                                                                    | More than 95% conversion at 377 °C                | N <sub>2</sub> O | D. Pietrogiacomì, M. C. Campa, L. Ardemani, and M. Occhiuzzi, <i>Catal. Today</i> <b>2019</b> , 336, 131-138.                                                                    |
| HCs-SCR                      | Pt,Pd,Rh/Al <sub>2</sub> O <sub>3</sub> -ZrO <sub>2</sub> | [N <sub>2</sub> O] = [CH <sub>4</sub> ] = 4000 ppm, [O <sub>2</sub> ] = 20000 ppm, GHSV = 12000 NL kg h <sup>-1</sup> , He as balance                                                                | More than 90% conversion at 500 °C                | N <sub>2</sub> O | M. C. Campa, A. M. Doyle, G. Fierro and D. Pietrogiacomì, <i>Catal. Today</i> , 2022, <b>384-386</b> , 76-87.                                                                    |
| HCs-SCR                      | CuFeOx thin-film catalysts                                | 1% N <sub>2</sub> O, 1% CH <sub>4</sub> in Ar as the balanced gas, GHSV = 185000 mL/(g h)                                                                                                            | 80% N <sub>2</sub> O conversion at 490 °C         |                  | W. Muhammad, L. Wu, A. El Kasmi, A. Muhammad, and Z. Tian, <i>J. Therm. Sci.</i> <b>2023</b> , 32, 531-541.                                                                      |
| Photocatalytic decomposition | g-C <sub>3</sub> N <sub>4</sub>                           | Reactor filled with the N <sub>2</sub> O/He mixture (1020 ppm) and illuminated by an 8 W Hg lamp with a maximum light intensity at 254 nm                                                            | About 43 % N <sub>2</sub> O conversion after 14 h |                  | P. Praus, L. Svoboda, M. Ritz, I. Troppová, M. Šihor and K. Kočí, <i>Mater. Chem. Phys.</i> , 2017, <b>193</b> , 438-446.                                                        |
| Photocatalytic decomposition | BiVO <sub>4</sub>                                         | 3 vol.% O <sub>2</sub> , 0.68 vol.% N <sub>2</sub> O and balance Ar, and the catalyst used is 0.20 g; under UVA (λ = 365 nm) irradiation with Xenon lamp at ambient temperature                      | 26.7% N <sub>2</sub> O conversion after 12 h      |                  | L. Wang, J. Liu, W. Song, H. Wang, Y. Li, J. Liu, Z. Zhao, J. Tan, Z. Duan and J. Deng, <i>Chem. Eng. J.</i> , 2019, <b>366</b> , 504-513.                                       |
| Photocatalytic decomposition | BiVO <sub>4</sub>                                         | 680 ppm of N <sub>2</sub> O, 3 vol % O <sub>2</sub> , and balance Ar, under the visible light irradiation (λ > 420 nm)                                                                               | 27.1% N <sub>2</sub> O conversion after 12 h      |                  | J. Liu, L. Wang, W. Song, M. Zhao, J. Liu, H. Wang, Z. Zhao, C. Xu and Z. Duan, <i>ACS Sustainable Chem. Eng.</i> , 2018, <b>7</b> , 2811-2820.                                  |
| Photocatalytic decomposition | Bi <sub>2</sub> WO <sub>6</sub>                           | 680 ppm of N <sub>2</sub> O, 3 vol % O <sub>2</sub> , and balance Ar, under the visible light irradiation (λ > 420 nm)                                                                               | 12.8% N <sub>2</sub> O conversion after 12 h      |                  | J. Liu, L. Wang, W. Song, M. Zhao, J. Liu, H. Wang, Z. Zhao, C. Xu and Z. Duan, <i>ACS Sustainable Chem. Eng.</i> , 2018, <b>7</b> , 2811-2820.                                  |
| Photocatalytic decomposition | g-C <sub>3</sub> N <sub>4</sub> /BiVO <sub>4</sub>        | Reactor filled with the N <sub>2</sub> O/He mixture (1050 ppm) and P = 1.5 bar, 8 W Hg lamp under UVA irradiation (λ = 365 nm)                                                                       | About 15 % N <sub>2</sub> O conversion after 22 h |                  | M. Reli, I. Troppová, M. Šihor, J. Pavlovský, P. Praus and K. Kočí, <i>Appl. Surf. Sci.</i> , 2019, <b>469</b> , 181-191.                                                        |
| Photocatalytic decomposition | TiO <sub>2</sub> /C <sub>3</sub> N <sub>4</sub>           | The reactor was filled with a N <sub>2</sub> O/He mixture (968 ppm) and irradiated by an 8 W Hg lamp (λ = 254 nm; intensity =                                                                        | 57% N <sub>2</sub> O conversion after 16 h        |                  | M. Reli, P. Huo, M. Šihor, N. Ambrožová, I. Troppová, L. Matějová, J. Lang, L. Svoboda, P. Kuśtrowski, M. Ritz, P. Praus                                                         |

|                                 |                                                     |                                                                                                                                        |                                                                                                                                                                                          |                                                                                                                                                                                                    |
|---------------------------------|-----------------------------------------------------|----------------------------------------------------------------------------------------------------------------------------------------|------------------------------------------------------------------------------------------------------------------------------------------------------------------------------------------|----------------------------------------------------------------------------------------------------------------------------------------------------------------------------------------------------|
| Photocatalytic decomposition    | Nanobelt-like Bi <sub>2</sub> MoO <sub>6</sub>      | 0.5 mW/cm <sup>2</sup> )<br>N <sub>2</sub> O = 0.68 vol. %, O <sub>2</sub> = 3 vol. %, Ar balance, under UVA irradiation (λ=365 nm)    | 21.7% N <sub>2</sub> O conversion after 12 h<br>More than 60% N <sub>2</sub> O conversion after 14 h (λ = 254 nm);<br>more than 60% N <sub>2</sub> O conversion after 18 h (λ = 365 nm); | and K. Kočí, <i>J. Phys. Chem. A</i> , 2016, <b>120</b> , 8564-8573.<br>J. Tan, H. Cheng, J. Liu, J. Sun, Y. Li, H. Wang, J. Liu and Z. Zhao, <i>ChemistrySelect</i> , 2019, <b>4</b> , 5338-5344. |
| Photocatalytic decomposition    | TiO <sub>2</sub> /g-C <sub>3</sub> N <sub>4</sub>   | N <sub>2</sub> O/He mixture (1020 ppm), under UVC (λ= 254 nm) and UVA (λ= 365 nm) irradiation                                          | More than 60% N <sub>2</sub> O conversion after 14 h (λ = 254 nm);<br>more than 60% N <sub>2</sub> O conversion after 18 h (λ = 365 nm);                                                 | K. Kočí, M. Reli, I. Troppová, M. Šihor, J. Kupková, P. Kustrowski and P. Praus, <i>Appl. Surf. Sci.</i> , 2017, <b>396</b> , 1685-1695.                                                           |
| Photocatalytic decomposition    | g-C <sub>3</sub> N <sub>4</sub> /BiOIO <sub>3</sub> | N <sub>2</sub> O/He mixture (1050 ppm) and P = 1.5 bar, under UVA irradiation (λ = 365 nm)                                             | About 14 % N <sub>2</sub> O conversion after 22 h                                                                                                                                        | V. Matějka, M. Šihor, M. Reli, A. Martaus, K. Kočí, M. Kormunda and P. Praus, <i>Mater. Sci. Semicond. Process.</i> , 2019, <b>100</b> , 113-122.                                                  |
| Photocatalytic decomposition    | g-C <sub>3</sub> N <sub>4</sub> /WO <sub>3</sub>    | 998 ppm N <sub>2</sub> O in He and P = 1.6 bar, under UVA irradiation at λ = 365 nm                                                    | About 15 % N <sub>2</sub> O conversion after 20 h                                                                                                                                        | M. Reli, L. Svoboda, M. Šihor, I. Troppová, J. Pavlovský, P. Praus and K. Kočí, <i>Environ. Sci. Pollut. Res.</i> , 2017, <b>25</b> , 34839-34850.                                                 |
| Photocatalytic decomposition    | Ag-TiO <sub>2</sub>                                 | 990 ppm N <sub>2</sub> O/He mixture (volume 756 cm <sup>3</sup> , pressure 110 kPa), 8 W Hg lamp with a peak light intensity at 254 nm | 77% N <sub>2</sub> O conversion after 24 h                                                                                                                                               | K. Kočí, S. Krejčíková, O. Šolcová and L. Obalová, <i>Catal. Today</i> , 2012, <b>191</b> , 134-137.                                                                                               |
| Photocatalytic decomposition    | Ce/TiO <sub>2</sub>                                 | 968 ppm N <sub>2</sub> O/He mixture (volume 182 mL, pressure 110 kPa), 8 W Hg lamp with a peak light intensity at 254 nm               | About 85 % N <sub>2</sub> O conversion after 18 h                                                                                                                                        | L. Matějová, M. Šihor, J. Lang, I. Troppová, N. Ambrožová, M. Reli, T. Brunátová, L. Čapek, A. Kotarba and K. Kočí, <i>J. Sol-Gel Sci. Technol.</i> , 2017, <b>84</b> , 158-168.                   |
| Combined plasma catalysis       | γ-Al <sub>2</sub> O <sub>3</sub>                    | 300 ppm N <sub>2</sub> O in N <sub>2</sub> at a rate of 100 mL min <sup>-1</sup> , plasma voltage (12 – 22 kV)                         | T <sub>100</sub> = 600 °C in deN <sub>2</sub> O;<br>above 90%                                                                                                                            | L. S. Ko, Y. S. Chen, K. L. Pan and M. B. Chang, <i>Catal. Commun.</i> , 2023, <b>177</b> , 106666.                                                                                                |
| Combined plasma catalysis       | RhFe/HAP-11                                         | 10 vol.% N <sub>2</sub> O-He at a rate of 30 mL min <sup>-1</sup> , plasma current (0.2 mA) and plasma voltage (20 kV)                 | 95.9% N <sub>2</sub> O conversion at 350 °C in deN <sub>2</sub> O;<br>90% N <sub>2</sub> O conversion at 200 °C                                                                          | X. Tan, H. Chen, L. Shi, Q. Lu, S. Qi, C. Yi and B. Yang, <i>Catal. Lett.</i> , 2023, <b>153</b> , 3724–3733.                                                                                      |
| Combined plasma catalysis       | Ru/γ-Al <sub>2</sub> O <sub>3</sub>                 | 450 ppm N <sub>2</sub> O, 10% O <sub>2</sub> at a rate of 1 L min <sup>-1</sup> , plasma voltage 25.6 kV                               | Above 70% N <sub>2</sub> O conversion at 300 °C                                                                                                                                          | J.-O. Jo, Q. H. Trinh, S. H. Kim and Y. S. Mok, <i>Catal. Today</i> , 2018, <b>310</b> , 42-48.                                                                                                    |
| Microwave-assisted experimental | NiCoAl/SiC                                          | 20 vol.% N <sub>2</sub> O in Ar, WHSV = 5 h <sup>-1</sup> or 20 h <sup>-1</sup> , microwave heating                                    | T <sub>100</sub> = 420 °C (20 h <sup>-1</sup> );<br>T <sub>100</sub> = 340 °C (5 h <sup>-1</sup> )                                                                                       | O. Muccioli, E. Meloni, S. Renda, M. Martino, F. Brandani, P. Pullumbi and V. Palma, <i>Processes</i> , 2023, <b>11</b> , 1511.                                                                    |
| Electrochemical reduction       | Working electrode: Ir (100) (110) (111)             | 1) Electrolyte: 0.1 M HClO <sub>4</sub> ;<br>2) N <sub>2</sub> O saturated solution                                                    | 1) Ir (110): ~0.75 mA cm <sup>-2</sup> (0.1 V <sub>RHE</sub> );<br>2) Ir (111): ~0.85 mA cm <sup>-2</sup> (0.1                                                                           | R. Gomez and M. J. Weaver, <i>Langmuir</i> , 2002, <b>18</b> , 4426-4432.                                                                                                                          |

|                           |                                                                                                   |                                                                                                                                                                                                                                                                                  |                                                                                                                                                                                                                                                           |                                                                                                                                              |
|---------------------------|---------------------------------------------------------------------------------------------------|----------------------------------------------------------------------------------------------------------------------------------------------------------------------------------------------------------------------------------------------------------------------------------|-----------------------------------------------------------------------------------------------------------------------------------------------------------------------------------------------------------------------------------------------------------|----------------------------------------------------------------------------------------------------------------------------------------------|
| Electrochemical reduction | Cathode: Metal wire (Zn, Pb, Fe, Cu) wound around a polyelectrolyte-coated porous glass tube      | 1) Electrolyte: 5% Nafion® 117 solution;<br>2) 17.7 mmol N <sub>2</sub> O, 3-13 mL min <sup>-1</sup> ;<br>Electrolysis time=6-8 h; Applied current density=1.4-12.8 mA cm <sup>-2</sup>                                                                                          | V <sub>RHE</sub> )<br>Max N <sub>2</sub> O reduction efficiency (6 h, 6 mL min <sup>-1</sup> ): Zn: 99.3% (12.8 mA cm <sup>-2</sup> ); Pb: 98.8% (12.8 mA cm <sup>-2</sup> ); Fe: 95.7% (12.8 mA cm <sup>-2</sup> ); Cu: 93.0% (7.1 mA cm <sup>-2</sup> ) | K. Kanazawa, H. Yamamura, M. Nakayama and K. Ogura, <i>J. Electroanal. Chem.</i> , 2002, <b>521</b> , 127-131.                               |
| Electrochemical reduction | Working electrode: OsPtCl <sub>6</sub> film deposited on glassy carbon electrode                  | 1) Electrolyte: 0.1 M KCl and 0.01 M H <sub>2</sub> PO <sub>4</sub> ;<br>2) N <sub>2</sub> O mixed with N <sub>2</sub> , the percentage of N <sub>2</sub> O=0, 30, 70, 100                                                                                                       | Onset potential=0.67 V <sub>RHE</sub>                                                                                                                                                                                                                     | S.M. Chen, S.H. Li and R. Thangamuthu, <i>Electroanalysis</i> , 2009, <b>21</b> , 1505-1513.                                                 |
| Electrochemical reduction | Cathode: Cone-shaped electrodes of La <sub>1-x</sub> Sr <sub>x</sub> FeO <sub>3</sub> perovskites | 1) Electrolyte: Yttria Stabilized Zirconia;<br>2) 1% N <sub>2</sub> O in Ar (20 mL min <sup>-1</sup> );<br>Temperature: 350, 400 and 450°C                                                                                                                                       | 0.023 mA cm <sup>-2</sup> (0.4 V <sub>RHE</sub> , 400 °C)                                                                                                                                                                                                 | K. K. Hansen, <i>Mater. Res. Bull.</i> , 2010, <b>45</b> , 1334-1337.                                                                        |
| Electrochemical reduction | Homogeneous catalyst: 15 μM CoMb;<br>Working electrode: Carbon cloth electrode                    | 1) Electrolyte: 80 mL of 50 mM phosphate buffer with CoMb (15 μM) and methyl viologen (2 mM);<br>2) 9 mL <sup>14</sup> N-N <sub>2</sub> O (100%) and 6 mL <sup>15</sup> N-N <sub>2</sub> O (100%) added into the headspace of the electrochemical cell; Electrolysis time=20 min | 1) Total N <sub>2</sub> : 11.3 to 19.6 μmol;<br>2) <sup>15</sup> N-N <sub>2</sub> : 41 to 72 nmol;<br>3) The ratio of <sup>15</sup> N-N <sub>2</sub> to <sup>14</sup> N-N <sub>2</sub> : 1.57 × 10 <sup>-5</sup> to 3.42 × 10 <sup>-5</sup>               | T. D. Rapson, S. Warneke, M. M. Musameh, H. Dacres, B. C. T. Macdonald and S. C. Trowell, <i>RCS Adv.</i> , 2015, <b>5</b> , 89003-89008.    |
| Electrochemical reduction | Working electrode: Porous In/Cu foam electrode                                                    | 1) Electrolyte: 0.5 M NaOH;<br>2) N <sub>2</sub> O saturated electrolyte solution and continued purging; Electrolysis time=5 h                                                                                                                                                   | 1) 25 mA cm <sup>-2</sup> (-0.75 V <sub>RHE</sub> );<br>2) ~100% N <sub>2</sub> Faradaic efficiency                                                                                                                                                       | K. H. Kim, T. Lim, M. J. Kim, S. Choe, S. Baek and J. J. Kim, <i>Electrochem. Commun.</i> , 2016, <b>62</b> , 13-16.                         |
| Electrochemical reduction | Working electrode: Pd <sub>60</sub> Cu <sub>40</sub> Catalyst coated on glassy carbon electrode   | 1) Electrolyte: 0.2 M KOH and 0.3 M K <sub>2</sub> SO <sub>4</sub> ;<br>2) N <sub>2</sub> O saturated electrolyte solution and continued purging                                                                                                                                 | 1) 6.0 mA cm <sup>-2</sup> (0.04 V <sub>RHE</sub> );<br>2) Tafel slope=0.096 V dec <sup>-1</sup>                                                                                                                                                          | S. Baek, K. Kim, O. S. Kwon, H. Kim, J. W. Han, O. J. Kwon and J. J. Kim, <i>J. Appl. Electrochem.</i> , 2020, <b>50</b> , 395-405.          |
| Electrochemical reduction | Working electrode: Au@Pd Core shell structure catalyst coated on RED                              | 1) Electrolyte: 0.3 M KOH and 0.2 M K <sub>2</sub> SO <sub>4</sub> ;<br>2) N <sub>2</sub> O saturated electrolyte solution and continued purging                                                                                                                                 | 1) 0.472 mA cm <sup>-2</sup> (-0.3 V <sub>SCE</sub> );<br>2) Tafel slope=0.105 V dec <sup>-1</sup> ;<br>3) Current density decreased 16% after 1000 cycles                                                                                                | K. Kim, J. Byun, H. Kim, K.-S. Lee, H. S. Lee, J. Kim, T. Hyeon, J. J. Kim and J. W. Han, <i>ACS Catal.</i> , 2021, <b>11</b> , 15089-15097. |
| Electrochemical reduction | Homogeneous catalyst: 0.5 mM Re(bpy)(CO) <sub>3</sub> Cl;<br>Working electrode: RED               | 1) Electrolyte: CH <sub>3</sub> CN/H <sub>2</sub> O=90/10;<br>2) N <sub>2</sub> O saturated electrolyte solution and continued purging; Electrolysis time=90 min                                                                                                                 | 1) 7.5 mA cm <sup>-2</sup> (-1.72 V <sub>SCE</sub> );<br>2) Max N <sub>2</sub> percentage obtained=29.5%                                                                                                                                                  | R. Deeba, F. Molton, S. Chardon-Noblat and C. Costentin, <i>ACS Catal.</i> , 2021, <b>11</b> , 6099-6103.                                    |
| Electrochemical reduction | Cathode: High surface area metallic Cu electrode                                                  | 1) Electrolyte: 0.1 M KOH;<br>2) Cathode gas=N <sub>2</sub> O or Ar; Anode gas=Ar (20 mL min <sup>-1</sup> )                                                                                                                                                                     | 1) 10.0 mA cm <sup>-2</sup> (-0.2 V <sub>RHE</sub> );<br>2) N <sub>2</sub> Faradaic efficiency=83.3%;<br>3) Tafel slope=0.124 V dec <sup>-1</sup>                                                                                                         | S. Nilvichean, K. Meesombad, T. Butburee, P. Chakthranont and R. Methaapanon, <i>React. Chem. Eng.</i> , 2022, <b>8</b> , 84-95.             |
| Electrochemical reduction | Working electrode: Pt/Pd deposited on fluorine-doped                                              | 1) Electrolyte: 0.1 M HClO <sub>3</sub> ;<br>2) N <sub>2</sub> O saturated solution                                                                                                                                                                                              | -0.25±0.04 mA cm <sup>-2</sup> (0.16 V <sub>RHE</sub> )                                                                                                                                                                                                   | A. C. Sarker, M. Kato and I. Yagi, <i>Electrochim. Acta</i> , 2022, <b>425</b> , 140628.                                                     |



tin oxide (FTO) electrode

|                           |                                                                                                                                               |                                                                                                                                                                                                                                                                                                                                                                                                         |                                                                                                                                                                                                                                                                                                    |                                                                                                                                                                        |
|---------------------------|-----------------------------------------------------------------------------------------------------------------------------------------------|---------------------------------------------------------------------------------------------------------------------------------------------------------------------------------------------------------------------------------------------------------------------------------------------------------------------------------------------------------------------------------------------------------|----------------------------------------------------------------------------------------------------------------------------------------------------------------------------------------------------------------------------------------------------------------------------------------------------|------------------------------------------------------------------------------------------------------------------------------------------------------------------------|
| Electrochemical reduction | Working electrode: $\text{La}_{0.6}\text{Sr}_{0.4}\text{Co}_{0.2}\text{Fe}_{0.8}\text{O}_{3-\delta}$ (LSCF)                                   | 1) Electrolyte: 8YSZ (( $\text{ZrO}_2$ ) <sub>0.92</sub> ( $\text{Y}_2\text{O}_3$ ) <sub>0.08</sub> ) substrate;<br>2) >99.5% purity of $\text{N}_2\text{O}$ with $\text{N}_2$ <0.4% ( $50 \text{ mL min}^{-1}$ ); Temperature: 600, 700 and $800^\circ\text{C}$ ; Current: -0.10 A and -0.25 A                                                                                                         | 1) Faradaic Efficiency=8.95;<br>2) Conversion increment=13.15 (-0.25 A, $600^\circ\text{C}$ )                                                                                                                                                                                                      | L. I. V. Holz, F. J. A. Loureiro, A. J. M. Araujo, V. C. D. Graca, D. Mendes, A. Mendes and D. P. Fagg, <i>Int. J. Energ. Res.</i> , 2022, <b>46</b> , 22038-22048.    |
| Electrochemical reduction | Homogeneous catalyst: $[\text{Re}(\text{bpy})(\text{CO})_3\text{X}]^{n+}$ (X= $\text{CH}_3\text{CN}$ , Cl, n =0 or 1); Working electrode: RED | 1) Electrolyte: $\text{CH}_3\text{CN}+0.1 \text{ M } n\text{-NBu}_4\text{PF}_6$ ;<br>2) $\text{CH}_3\text{CN}$ solution of saturated $\text{N}_2\text{O}$ , 1.5 mM $\text{N}_2\text{O}$ ; Constant potential=-1.22 V; Electrolysis time=4 h                                                                                                                                                             | $\text{N}_2$ Faradaic efficiency=90%                                                                                                                                                                                                                                                               | R. Deeba, S. Chardon-Noblat and C. Costentin, <i>ACS Catal.</i> , 2023, <b>13</b> , 8262-8272.                                                                         |
| Electrochemical reduction | Cathode: $\text{Sr}_2\text{Fe}_{1.5}\text{Mo}_{0.5}\text{O}_{6-\delta}$ (SFMO)                                                                | 1) Electrolyte: 8YSZ substrate;<br>2) >99.5% purity of $\text{N}_2\text{O}$ with $\text{N}_2$ <0.4% ( $50 \text{ mL min}^{-1}$ ); Temperature: 600, 700 and $800^\circ\text{C}$ ; Current: -0.10 A and -0.25 A ( $50 \text{ mL min}^{-1}$ )                                                                                                                                                             | 1) Faradaic Efficiency=3.94;<br>2) Conversion increment=5.01 (-0.25 A, $600^\circ\text{C}$ )                                                                                                                                                                                                       | L. I. V. Holz, F. J. A. Loureiro, V. C. D. Graça, S. M. Mikhalev, C. Fernandes, A. Mendes and D. P. Fagg, <i>Int. J. Hydrogen Energy</i> <b>2023</b> , <i>5</i> , 251. |
| Electrochemical reduction | Homogeneous catalyst: Iron tetraphenylporphyrin (FeTPP); Working electrode: Carbon fabric                                                     | 1) Electrolyte: 1 mM FeTPP in THF solution with 20 equivalents of water;<br>2) $\text{N}_2\text{O}$ saturated solution; Applied potential=-2.3 V vs $\text{Fe}(\text{C}_5\text{H}_5)^{2+/0}$ ; Electrolysis time=2.2 h                                                                                                                                                                                  | 1) Average Faradaic yield: 100.1% (Standard deviation of 4.7%);<br>2) Reaction rate=12.6 $\text{s}^{-1}$                                                                                                                                                                                           | J. S. Stanley, X. S. Wang and J. Y. Yang, <i>ACS Catal.</i> , 2023, <b>13</b> , 12617-12622.                                                                           |
| Electrochemical reduction | Working electrode: Polycrystalline Cu                                                                                                         | 1) Electrolyte: 0.3 M $\text{K}_2\text{SO}_4$ or $\text{Na}_2\text{SO}_4$ ;<br>2) $\text{N}_2\text{O}$ -saturated electrolyte solution and continued purging                                                                                                                                                                                                                                            | 1) $\text{K}_2\text{SO}_4$ : -43.75 $\text{mA cm}^{-2}$ ;<br>2) $\text{Na}_2\text{SO}_4$ : -33 $\text{mA cm}^{-2}$ ; (-1.4 $\text{V}_{\text{SCE}}$ )                                                                                                                                               | O. S. Kwon, S. Baek, H. Kim, I. Choi, O. J. Kwon and J. J. Kim, <i>Electroanalysis</i> , 2019, <b>31</b> , 739-745.                                                    |
| Electrochemical reduction | Working electrode: Cu foil                                                                                                                    | 1) Electrolyte: 75 vol% 1-butyl-3-methylimidazolium tetrafluoroborate ( $[\text{BMIM}][\text{BF}_4]$ ) ionic liquid and propylene carbonate (PC) organic solvent or 0.3 M $\text{K}_2\text{SO}_4$ ;<br>2) $\text{N}_2\text{O}$ -saturated electrolyte solution and continued purging; -2.27 V (vs. $\text{Fc}/\text{Fc}^+$ ) in $[\text{BMIM}][\text{BF}_4]/\text{PC}$ and -1.3 $\text{V}_{\text{SCE}}$ | 1) $\text{N}_2$ Faradaic efficiency: 90.9% in $[\text{BMIM}][\text{BF}_4]/\text{PC}$ , 41.0% in $\text{K}_2\text{SO}_4$ ;<br>2) Current efficiency variation within 1800 s: remain over 95% in $[\text{BMIM}][\text{BF}_4]/\text{PC}$ and decreased from 83.9% to 49.6% in $\text{K}_2\text{SO}_4$ | H. Kim, S. Baek, T. Lim and J. J. Kim, <i>Electrochem. Commun.</i> , 2020, <b>113</b> , 106688.                                                                        |
| Electrochemical reduction | Cathode: silver solid amalgam electrode (AgSAE)                                                                                               | Catholyte: 0.05 M $\text{Ni}(\text{II})\text{CN}_4^{2-}$ and 9 M KOH;<br>2) 20 ppm $\text{N}_2\text{O}$ by Ar diluted gas ( $1 \text{ L min}^{-1}$ ); Current density=25 $\text{mA cm}^{-2}$ ; Constant electrolysis time $\geq$ 6 h                                                                                                                                                                    | $\text{N}_2\text{O}$ removal efficiency=99.8%                                                                                                                                                                                                                                                      | P. Silambarasan, A. G. Ramu, M. Govarthan, K. D. Jung and I. S. Moon, <i>J. Hazard. Mater.</i> , 2021, <b>420</b> , 126564.                                            |
| Electrochemical reduction | Working electrode: polycrystalline Pt and Pd                                                                                                  | 1) Electrolyte: 0.1 M NaOH or 0.1 M NaOH and 0.5 M or 1 M $\text{CH}_3\text{OH}$ ;                                                                                                                                                                                                                                                                                                                      | Tafel slope: Pt=0.111 $\pm$ 0.019 $\text{V dec}^{-1}$ , Pd=0.084 $\pm$ 0.007 V                                                                                                                                                                                                                     | A. Aziznia, A. Bonakdarpour, E. L. Gyenge and C. W. Oloman, <i>Electrochim.</i>                                                                                        |

|                           |                                                                                                                                                                                                                        |                                                                                                                                                                                                              |                                                                                                                                                   |                                                                                                           |
|---------------------------|------------------------------------------------------------------------------------------------------------------------------------------------------------------------------------------------------------------------|--------------------------------------------------------------------------------------------------------------------------------------------------------------------------------------------------------------|---------------------------------------------------------------------------------------------------------------------------------------------------|-----------------------------------------------------------------------------------------------------------|
|                           | electrodes                                                                                                                                                                                                             | 2) N <sub>2</sub> O saturated electrolyte solution and continued purging; Temperature: 295 K and 333 K; Electrode rotation speed 0-3600 rpm                                                                  | dec <sup>-1</sup> (0.1 M NaOH, 295 K; 1600 rpm, 0.01 V s <sup>-1</sup> )                                                                          | <i>Acta</i> , 2011, <b>56</b> , 5238-5244.                                                                |
| Electrochemical reduction | Cathode: Cu;<br>Scrubbing electrocatalyst: Ni(I)TSPc                                                                                                                                                                   | 1) Electrolyte: Anolyte: 1 M H <sub>2</sub> SO <sub>4</sub> , Catholyte: 1 M KOH with 1 mM Ni(II)TSPc;<br>2) 5-30 ppm N <sub>2</sub> O by Ar diluted gas; 30 mA cm <sup>-2</sup> ; Reaction period: 5-20 min | N <sub>2</sub> O removal efficiency: 100% (5 ppm N <sub>2</sub> O), 90% (10 ppm), 65% (20 ppm), 45% (30 ppm)                                      | P. Silambarasan and I. S. Moon, <i>Environ. Res.</i> , 2022, <b>204</b> , 111912.                         |
| Electrochemical reduction | Cathode: Metal catalysts (Depositing Fe, Co, Ni, Cu, Pd, Ag, Pt particles onto gas diffusion layer)                                                                                                                    | 1) Electrolyte: 0.1 M NaOH and 0.9 M NaClO <sub>4</sub> ;<br>2) Gas-fed three-compartment flow cell; N <sub>2</sub> O flow (10 mL min <sup>-1</sup> )                                                        | N <sub>2</sub> Faradaic efficiency: Co: 91.4% (-0.19 V <sub>RHE</sub> ); Cu: 91.7% (-0.31 V <sub>RHE</sub> ); Ag: 94.3% (-0.37 V <sub>RHE</sub> ) | B. H. Ko, B. Hasa, H. Shin, Y. Zhao and F. Jiao, <i>J. Am. Chem. Soc.</i> , 2022, <b>144</b> , 1258-1266. |
| Electrochemical reduction | Anode: Pr <sub>0.6</sub> Sr <sub>0.4</sub> Fe <sub>0.8</sub> Nb <sub>0.1</sub> Cu <sub>0.1</sub> O <sub>3-δ</sub><br>Cathode: La <sub>0.6</sub> Sr <sub>0.4</sub> Co <sub>0.2</sub> Fe <sub>0.8</sub> O <sub>3-δ</sub> | N <sub>2</sub> O flow (80 mL min <sup>-1</sup> )                                                                                                                                                             | 1) N <sub>2</sub> O conversion efficiency=19.0%;<br>2) Ethane conversion efficiency=45.2%;<br>3) Ethylene selectivity=92.5%                       | S. Lei, A. Wang, G. Weng, Y. Wu, J. Xue and H. Wang, <i>J. Energy. Chem.</i> , 2023, <b>77</b> , 359-368. |

\*\* T<sub>50</sub> is temperature at which N<sub>2</sub>O conversion reached 50%; T<sub>90</sub> is temperature at which N<sub>2</sub>O conversion reached 90%; T<sub>100</sub> is temperature at which N<sub>2</sub>O conversion reached 100%; r<sub>N<sub>2</sub>O</sub> is N<sub>2</sub>O reaction rate

\*\* "NA" represents no specific indication or not involved in the research.

\*\*\* Except exceptionally indicated, the reaction conditions are ambient temperature and pressure, i.e., 25 °C and 101 KPa.

**Table S2.** Summary of representative studies for N<sub>2</sub>O valorization.

| The role of N <sub>2</sub> O                                 | Reaction substrate                                                                | Final products                                                                                          | Catalyst                                                                                       | Reaction conduction                                                                                           | Efficiency                                                                                                                                                                                                                                                                                                                                                               | Ref.                                                                                                                                               |
|--------------------------------------------------------------|-----------------------------------------------------------------------------------|---------------------------------------------------------------------------------------------------------|------------------------------------------------------------------------------------------------|---------------------------------------------------------------------------------------------------------------|--------------------------------------------------------------------------------------------------------------------------------------------------------------------------------------------------------------------------------------------------------------------------------------------------------------------------------------------------------------------------|----------------------------------------------------------------------------------------------------------------------------------------------------|
| O-atom donor:<br>Benzene oxidation to phenol                 | C <sub>6</sub> H <sub>6</sub>                                                     | C <sub>6</sub> H <sub>5</sub> OH                                                                        | Fe-MFI zeolites of aluminosilicate (AS), borosilicate (BS) and titanosilicate (TS) composition | 375 °C; 5.5 mol% N <sub>2</sub> O, 50 mol% C <sub>6</sub> H <sub>6</sub> , 2 mL s <sup>-1</sup> ; Time=15 min | 1) Conversion: 0.9%-1.5% for C <sub>6</sub> H <sub>6</sub> , 11-16% for N <sub>2</sub> O;<br>2) Selectivity: C <sub>6</sub> H <sub>6</sub> >99%, N <sub>2</sub> O >70%                                                                                                                                                                                                   | V. S. Chernyavsky, L. V. Pirutko, A. K. Uriarte, A. S. Kharitonov and G. I. Panov, <i>J. Catal.</i> , 2007, <b>245</b> , 466-469.                  |
| O-atom donor:<br>Benzene oxidation to phenol                 | C <sub>6</sub> H <sub>6</sub>                                                     | C <sub>6</sub> H <sub>5</sub> OH                                                                        | Fe/ZSM-5-Hix-F                                                                                 | 425 °C; 5 mol% N <sub>2</sub> O and 50 mol% C <sub>6</sub> H <sub>6</sub> in He; Time=3-30 h                  | 1) Conversion: 100% for N <sub>2</sub> O;<br>2) Selectivity of C <sub>6</sub> H <sub>6</sub> =93.3%;<br>3) C <sub>6</sub> H <sub>5</sub> OH formation rate=16.49 ± 0.06 mmol <sub>phenol</sub> g <sub>catalyst</sub> <sup>-1</sup> h <sup>-1</sup> ;<br>4) C <sub>6</sub> H <sub>5</sub> OH productivity=0.44 ton <sub>phenol</sub> kg <sub>catalyst</sub> <sup>-1</sup> | J. Chen, R. Yin, G. Chen, J. Lang, X. Chen, X. Chu and J. Li, <i>Green Energy. Environ.</i> , 2023, <b>8</b> , 4-9.                                |
| O-atom donor:<br>Benzene oxidation to phenol                 | 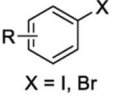 |                        | Bipyridine-supported Ni(II) complex                                                            | 25 °C; 1.5–2 bar N <sub>2</sub> O                                                                             | 73% yield of phenol                                                                                                                                                                                                                                                                                                                                                      | F. Le Vaillant, A. Mateos Calbet, S. González-Pelayo, E. J. Reijerse, S. Ni, J. Busch and J. Cornella, <i>Nature</i> , 2022, <b>604</b> , 677-683. |
| O-atom donor:<br>Benzene oxidation to phenol                 |  |                        | 1, 4-Ni shift                                                                                  | 60 °C; 2 atm N <sub>2</sub> O; Time=48 h                                                                      | Max yield=87%                                                                                                                                                                                                                                                                                                                                                            | H. Zhang, J. Rodrialvarez and R. Martin, <i>J. Am. Chem. Soc.</i> , 2023, <b>145</b> , 17564-17569.                                                |
| O-atom donor:<br>Oxidation of alkanes to oxygenated organics | CH <sub>4</sub>                                                                   | CH <sub>3</sub> OH, CH <sub>3</sub> OCH <sub>3</sub> , CH <sub>2</sub> O, C <sub>2</sub> H <sub>4</sub> | Fe-ferrierite (Fe-FER)                                                                         | 250-350 °C; CH <sub>4</sub> /N <sub>2</sub> O=0.5-6.0                                                         | CH <sub>4</sub> /N <sub>2</sub> O=0.5:<br>1) Methane conversion=57%;<br>2) Selectivity to valuable products=24.4%                                                                                                                                                                                                                                                        | G. Zhao, A. Adesina, E. Kennedy and M. Stockenhuber, <i>ACS Catal.</i> , 2020, <b>10</b> , 1406-1416.                                              |
| O-atom donor:<br>Oxidation of alkanes to oxygenated organics | C <sub>3</sub> H <sub>8</sub>                                                     | Propene oxide                                                                                           | V/SBA-3                                                                                        | 400 °C and 430 °C; C <sub>3</sub> H <sub>8</sub> /N <sub>2</sub> O/He=1/15/12/5; Time=2 h, contact time=2.1 s | 1) C <sub>3</sub> H <sub>8</sub> conversion=50% (400 °C);<br>2) Propene oxide selectivity from propene=~20% (400 °C)                                                                                                                                                                                                                                                     | A. Held, J. Kowalska-Kuś and K. Nowińska, <i>J. Catal.</i> , 2016, <b>336</b> , 23-32.                                                             |
| O-atom donor:<br>Oxidation of alkanes to oxygenated organics | Cyclohexane                                                                       | Cyclohexanol and cyclohexanone                                                                          | PMO <sub>12-n</sub> V n , n =1–3                                                               | Visible light-triggered; 1 atm N <sub>2</sub> O; 1 mmol cyclohexane.                                          | 1) Selectivity of cyclohexanol and cyclohexanone =90.2%;<br>2) Selectivity of cyclohexanone=82.7%;<br>2) Cyclohexane conversion                                                                                                                                                                                                                                          | J. She, Z. Fu, J. Li, B. Zeng, S. Tang, W. Wu, H. Zhao, D. Yin and S. R. Kirk, <i>Appl. Catal. B Environ.</i> , 2016, <b>182</b> , 392-404.        |

|                                                                |                                                                                                                 |                                                                                     |                                                                                     |                                                                                                                                                                                                                                        |                                                                                                                                                                                                                        |                                                                                                                                                                                                                                                  |
|----------------------------------------------------------------|-----------------------------------------------------------------------------------------------------------------|-------------------------------------------------------------------------------------|-------------------------------------------------------------------------------------|----------------------------------------------------------------------------------------------------------------------------------------------------------------------------------------------------------------------------------------|------------------------------------------------------------------------------------------------------------------------------------------------------------------------------------------------------------------------|--------------------------------------------------------------------------------------------------------------------------------------------------------------------------------------------------------------------------------------------------|
| O-atom donor:<br>Oxidation of olefins to ketones and aldehydes | Propane-propylene mixture                                                                                       | Acetone, propionaldehyde, and acetaldehyde                                          | NA                                                                                  | 450 °C and 0.7 MPa;<br>15 mol % propane and 85 mol % propylene                                                                                                                                                                         | rate=26.2%<br><br>1) N <sub>2</sub> O conversion rate=74.5%;<br>2) Propylene conversion rate=12.5%;<br>3) Selectivity of acetone, propionaldehyde, and acetaldehyde=74.6%;<br>4) Selectivity of methylcyclopropane=6%. | K. A. Dubkov, M. V. Parfenov and A. S. Kharitonov, <i>Ind. Eng. Chem. Res.</i> , 2020, <b>59</b> , 14157-14162.                                                                                                                                  |
| O-atom donor:<br>Oxidation of olefins to ketones and aldehydes | Butene-butane mixture (BBM)                                                                                     | Methyl ethyl ketone (MEK)                                                           | NA                                                                                  | 220–260 °C; 5-8 MPa;<br>0.093 mol BBM and 0.093 mol N <sub>2</sub> O;<br>Solvent: <i>n</i> -hexadecane;<br>Time=6-12 h<br>150 °C; 1 atm N <sub>2</sub> O; 1 mmol of substrate; 0.01 mmol catalyst; 1 mL of fluorobenzene;<br>Time=18 h | 1) MEK selectivity=45.9%-47.2%;<br>2) Total selectivity to ketones/aldehydes=87%                                                                                                                                       | S. V. Semikolenov and K. A. Dubkov, <i>Ind. Eng. Chem. Res.</i> , 2023, <b>62</b> , 9153-9158.                                                                                                                                                   |
| O-atom donor:<br>Oxidation of olefins to ketones and aldehydes | <br>R=R'=Alkyl, Aryl, H        |    | [Mn <sup>III</sup> <sub>2</sub> ZnW(O <sub>34</sub> ) <sub>2</sub> ] <sup>10-</sup> |                                                                                                                                                                                                                                        | Selective epoxidation of alkenes >99.9%                                                                                                                                                                                | R. Ben-Daniel, L. Weiner and R. Neumann, <i>J. Am. Chem. Soc.</i> , 2002, <b>124</b> , 8788-8789.                                                                                                                                                |
| N-atom donor                                                   | <br>Ar=Dipp, Mes, Xyl          |    | NA                                                                                  | 25 °C; N <sub>2</sub> O (~50 mL, 1 bar) was added at 0 °C;<br>Time=48 h                                                                                                                                                                | Yield: 43%-96%                                                                                                                                                                                                         | Eymann, L. Y. M.; Varava, P.; Shved, L. Y. M. Eymann, P. Varava, A. M. Shved, B. F. E. Curchod, Y. Liu, O. M. Planes, A. Sienkiewicz, R. Scopelliti, F. Fadaei Tirani and K. Severin, <i>J. Am. Chem. Soc.</i> , 2019, <b>141</b> , 17112-17116. |
| N-atom donor                                                   |                              |  | R'MgX                                                                               | 25 °C or 50 °C; N <sub>2</sub> O dissolved in THF;<br>Time=4 and 18 h                                                                                                                                                                  | Yield =68%-100% (4 h, 50 °C), 65%-100% (18 h, 50 °C), 9%-98% (4 h, 50 °C), 13%-95% (18 h, 50 °C)                                                                                                                       | G. Kiefer, T. Riedel, P. J. Dyson, R. Scopelliti and K. Severin, <i>Angew. Chem. Int. Ed.</i> , 2015, <b>54</b> , 302-305.                                                                                                                       |
| N-atom donor                                                   | <br>(R=Mes, <i>i</i> Pr, Me) |  | Arenes and AlCl <sub>3</sub>                                                        | Aromatic coupling partners: C <sub>6</sub> H <sub>5</sub> F, heterocycles, and polymers; 2 equiv AlCl <sub>3</sub> and 1 equiv R-N <sub>2</sub> O                                                                                      | Yield=52%-94%                                                                                                                                                                                                          | A. G. Tskhovrebov, L. C. E. Naested, E. Solari, R. Scopelliti and K. Severin, <i>Angew. Chem. Int. Ed.</i> , 2015, <b>54</b> , 1289-1292.                                                                                                        |

|                                       |                                                                                   |                                                                                   |                                                                                                                                       |                                                                                                                                      |                                                                                                                                                                                        |                                                                                                                                                                                            |
|---------------------------------------|-----------------------------------------------------------------------------------|-----------------------------------------------------------------------------------|---------------------------------------------------------------------------------------------------------------------------------------|--------------------------------------------------------------------------------------------------------------------------------------|----------------------------------------------------------------------------------------------------------------------------------------------------------------------------------------|--------------------------------------------------------------------------------------------------------------------------------------------------------------------------------------------|
| N-atom donor                          | 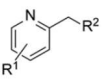 |  | NA                                                                                                                                    | 50 °C; Under N <sub>2</sub> O atmosphere (3x N <sub>2</sub> O/ <i>vac</i> cycles); 1.1 equiv <i>n</i> -BuLi and 0.05 M THF; Time=2 h | Conversion efficiency of triazolopyridines >95%                                                                                                                                        | I. R. Landman, F. Fadaei-Tirani and K. Severin, <i>Chem. Commun.</i> , 2021, <b>57</b> , 11537-11540.                                                                                      |
| Oxidant for oxidative dehydrogenation | C <sub>6</sub> H <sub>12</sub>                                                    | C <sub>6</sub> H <sub>10</sub> and C <sub>6</sub> H <sub>6</sub>                  | PCN-250 (Fe <sub>2</sub> Mn, Fe <sub>3</sub> , Fe <sub>2</sub> Co and Fe <sub>2</sub> Ni)                                             | 250 °C; N <sub>2</sub> O (5 mL min <sup>-1</sup> , 1%, Airgas); Time=8 h                                                             | Selective of C <sub>6</sub> H <sub>10</sub> : PCN-250 (Fe <sub>3</sub> ) and PCN-250 (Fe <sub>2</sub> Mn)=~100%; PCN-250 (Fe <sub>2</sub> Co) and PCN-250 (Fe <sub>2</sub> Ni)=93%-95% | M. Barona, S. Ahn, W. Morris, W. Hoover, J. M. Notestein, O. K. Farha and R. Q. Snurr, <i>ACS Catal.</i> , 2020, <b>10</b> , 1460-1469.                                                    |
| Oxidant for oxidative dehydrogenation | C <sub>2</sub> H <sub>6</sub>                                                     | C <sub>2</sub> H <sub>4</sub>                                                     | Sulfate-Modified NiAl                                                                                                                 | 480-600 °C; 2 vol % C <sub>2</sub> H <sub>6</sub> and 2 vol % N <sub>2</sub> O in He (30 mL min <sup>-1</sup> )                      | 1) C <sub>2</sub> H <sub>6</sub> conversion=52%;<br>2) C <sub>2</sub> H <sub>4</sub> Selectivity = ~100%;                                                                              | Y. Zhou, F. Wei, J. Lin, L. Li, X. Li, H. Qi, X. Pan, X. Liu, C. Huang, S. Lin and X. Wang, <i>ACS Catal.</i> , 2020, <b>10</b> , 7619-7629.                                               |
| Oxidant for oxidative dehydrogenation | Ethylbenzene                                                                      | Styrene                                                                           | K/Co <sub>2</sub> AlO <sub>4</sub>                                                                                                    | 500 °C; Molar ratio of N <sub>2</sub> O/ Ethylbenzene=3 (150 mL min <sup>-1</sup> ); Time=1-6 h                                      | 1) Ethylbenzene conversion=62.0%;<br>2) N <sub>2</sub> O conversion=~100%<br>3) Styrene selectivity=85.1%;                                                                             | Z. Liu, Y. Li, X. Sun, Z. Sui and X. Xu, <i>J. Ind. Eng. Chem.</i> , 2022, <b>112</b> , 67-75.                                                                                             |
| Oxidant for oxidative dehydrogenation | Cyclohexanol                                                                      | Cyclohexanone                                                                     | 1% Cu-decatungstate (DT) catalyst                                                                                                     | 25 °C; 1 atm; visible light illumination; substrate concentration=1 M; 0.012 mM catalyst.                                            | 1) Yield=46.3%;<br>2) Turnover frequency (TOF)=6.56 h <sup>-1</sup>                                                                                                                    | J. Zhu, B. Yang, Y. Deng, M. Chen, H. Wang, A. Wang, W. Gao, J. She, M. Luo, Y. Liu and Z. Fu, <i>Appl. Catal. B-Environ.</i> , 2022, <b>318</b> , 121861.                                 |
| Oxidant for oxidative dehydrogenation | CH <sub>4</sub>                                                                   | C <sub>2</sub> hydrocarbons                                                       | Mn-Na <sub>2</sub> WO <sub>4</sub> /SiO <sub>2</sub>                                                                                  | 800 °C; 40 vol % CH <sub>4</sub> and 10 vol % N <sub>2</sub> O in a He/Ne = 9:1 mixture (30 mL min <sup>-1</sup> )                   | Methane conversion into C <sub>2</sub> hydrocarbons >1                                                                                                                                 | Z. Aydin, A. Zanina, V. A. Kondratenko, J. Rabeah, J. Li, J. Chen, Y. Li, G. Jiang, H. Lund, S. Bartling, D. Linke and E. V. Kondratenko, <i>ACS Catal.</i> , 2022, <b>12</b> , 1298-1309. |
| Oxidant for oxidative dehydrogenation | R-MgX (R=aryl, alkenyl, alkyl; X=Cl, Br)                                          | R-R                                                                               | Li <sub>2</sub> CuCl <sub>4</sub> , Li <sub>2</sub> MnCl <sub>4</sub> , CoCl <sub>2</sub> , FeCl <sub>3</sub> , Fe(acac) <sub>3</sub> | 25 °C; 1 mol% catalyst; Time=1 h                                                                                                     | Yield=30-95%, 95% (CoCl <sub>2</sub> ); 94% (FeCl <sub>3</sub> , [Fe(acac) <sub>3</sub> ])                                                                                             | G. Kiefer, L. Jeanbourquin and K. Severin, <i>Angew. Chem. Int. Ed.</i> , 2013, <b>52</b> , 6302-6305.                                                                                     |

\* "NA" represents no specific indication or not involved in the research.
